# Supplementary material for: Development of microsatellite markers for the invasive mosquito Aedes koreicus
Source: PubMed Central journal article supplement (PMC10324130; doi:10.1186/s13071-023-05823-z), 2023-07-06
Supplement: 13071_2023_5823_MOESM2_ESM.pdf [file 13071_2023_5823_MOESM2_ESM.pdf]

1 A10\_AK1\_FonA-v50\_APG22\_PR0954.fsa

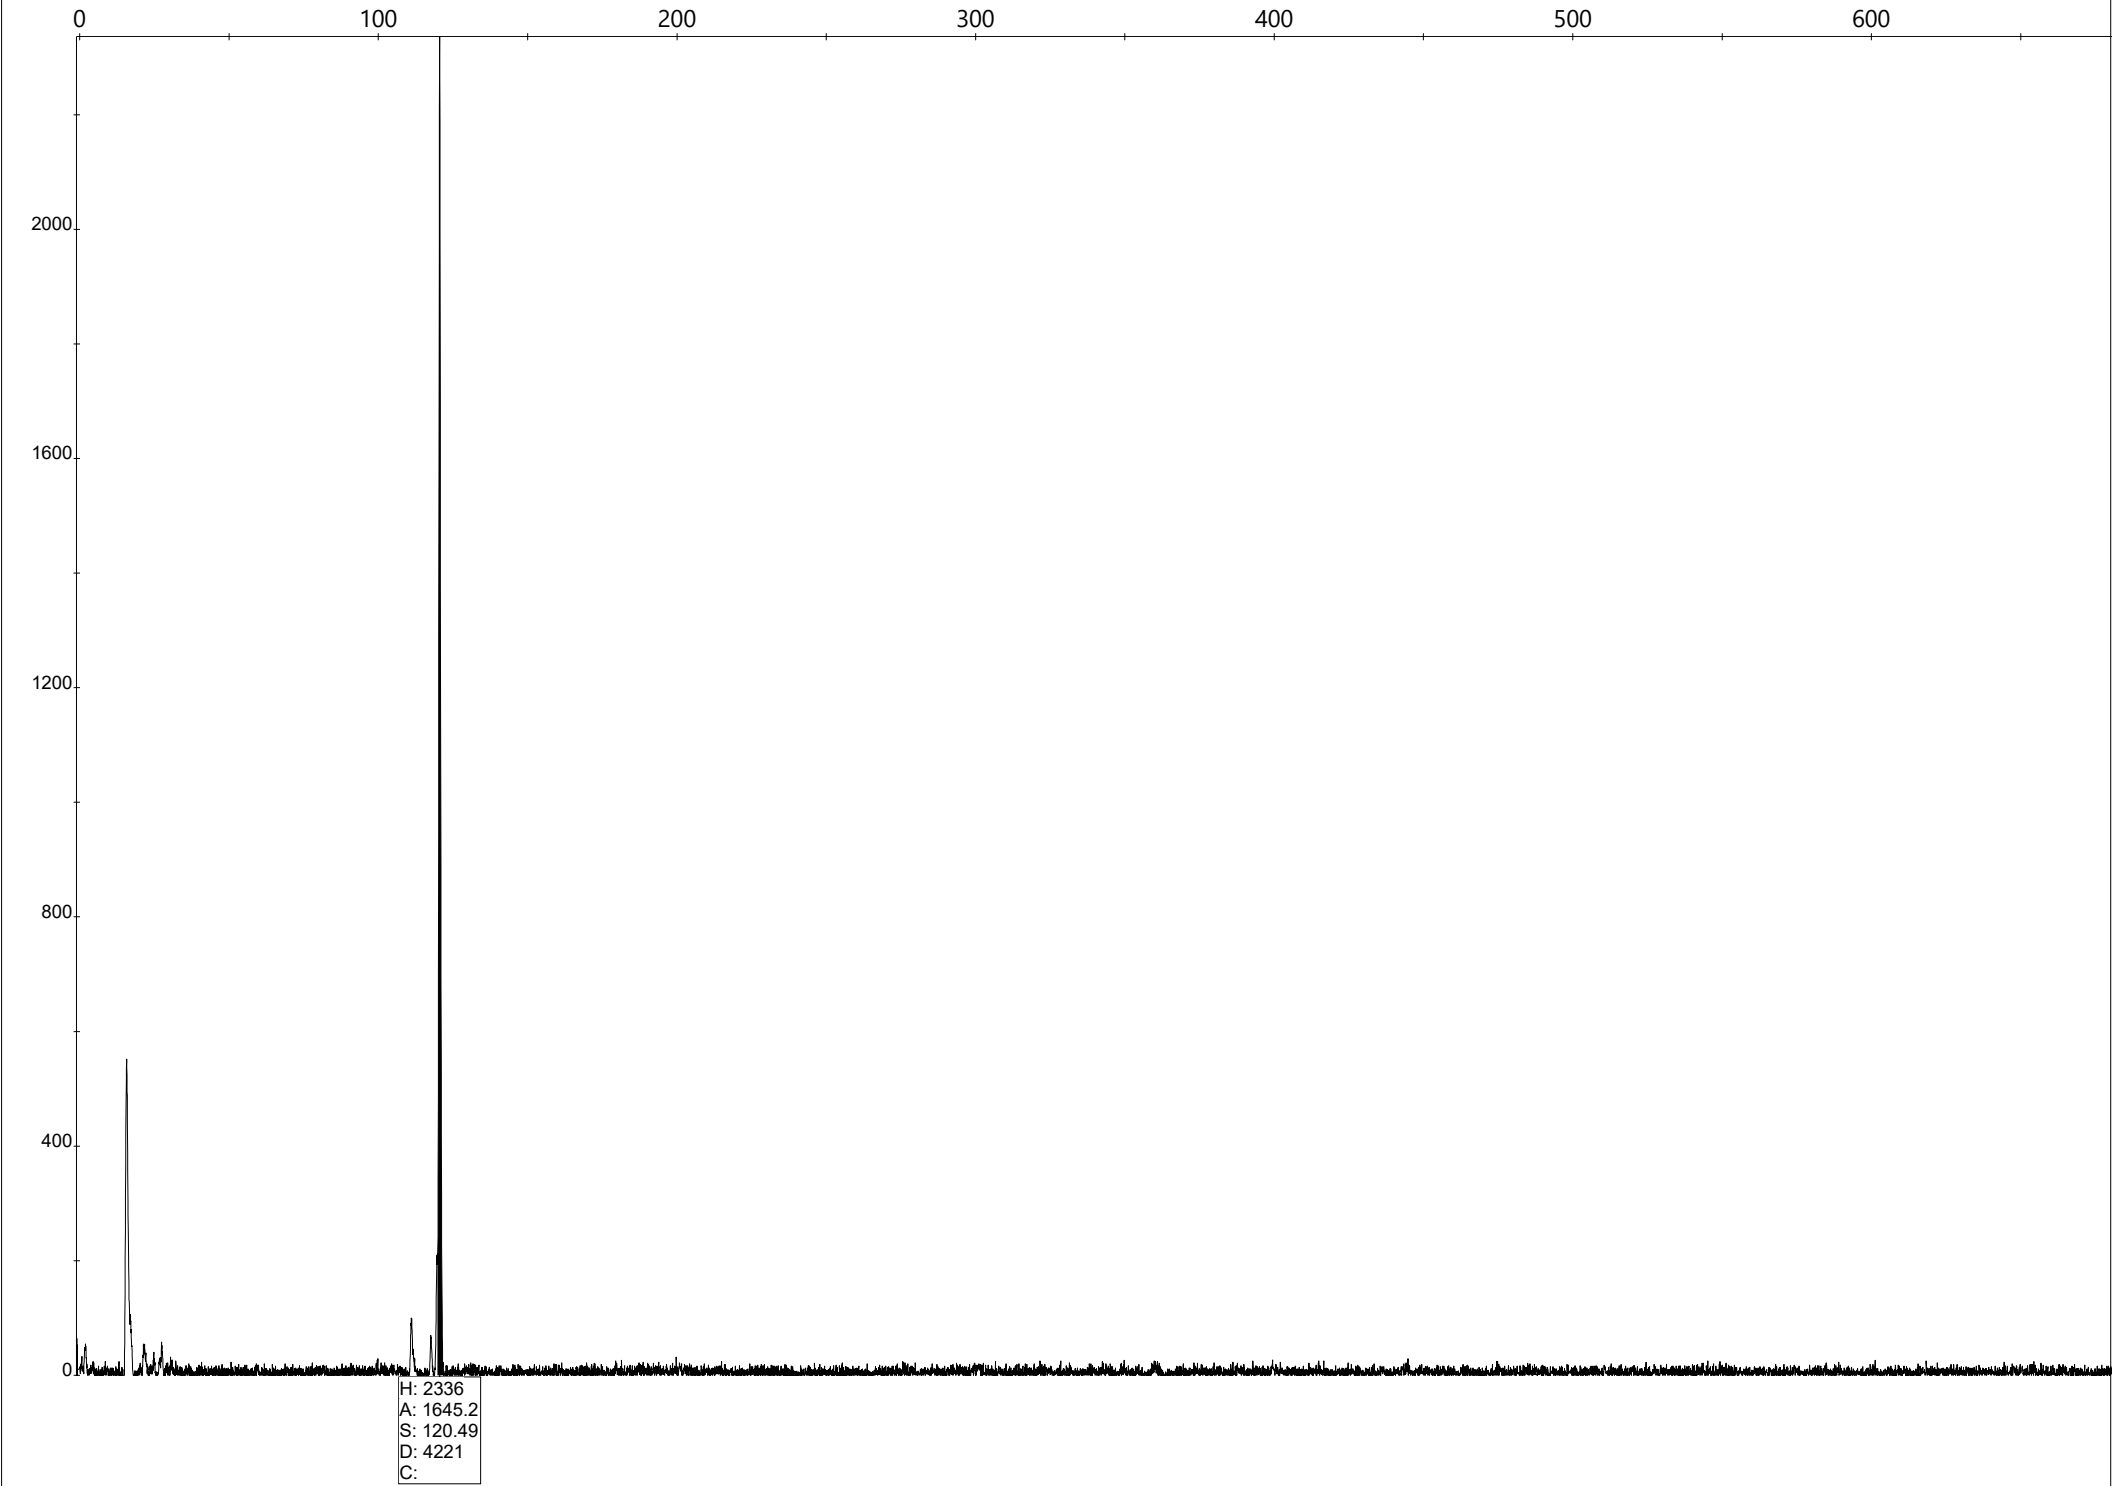

## Peak Scanner Software 2

2 D03\_AK3\_FonB-v20\_APG22\_PR0983.fsa

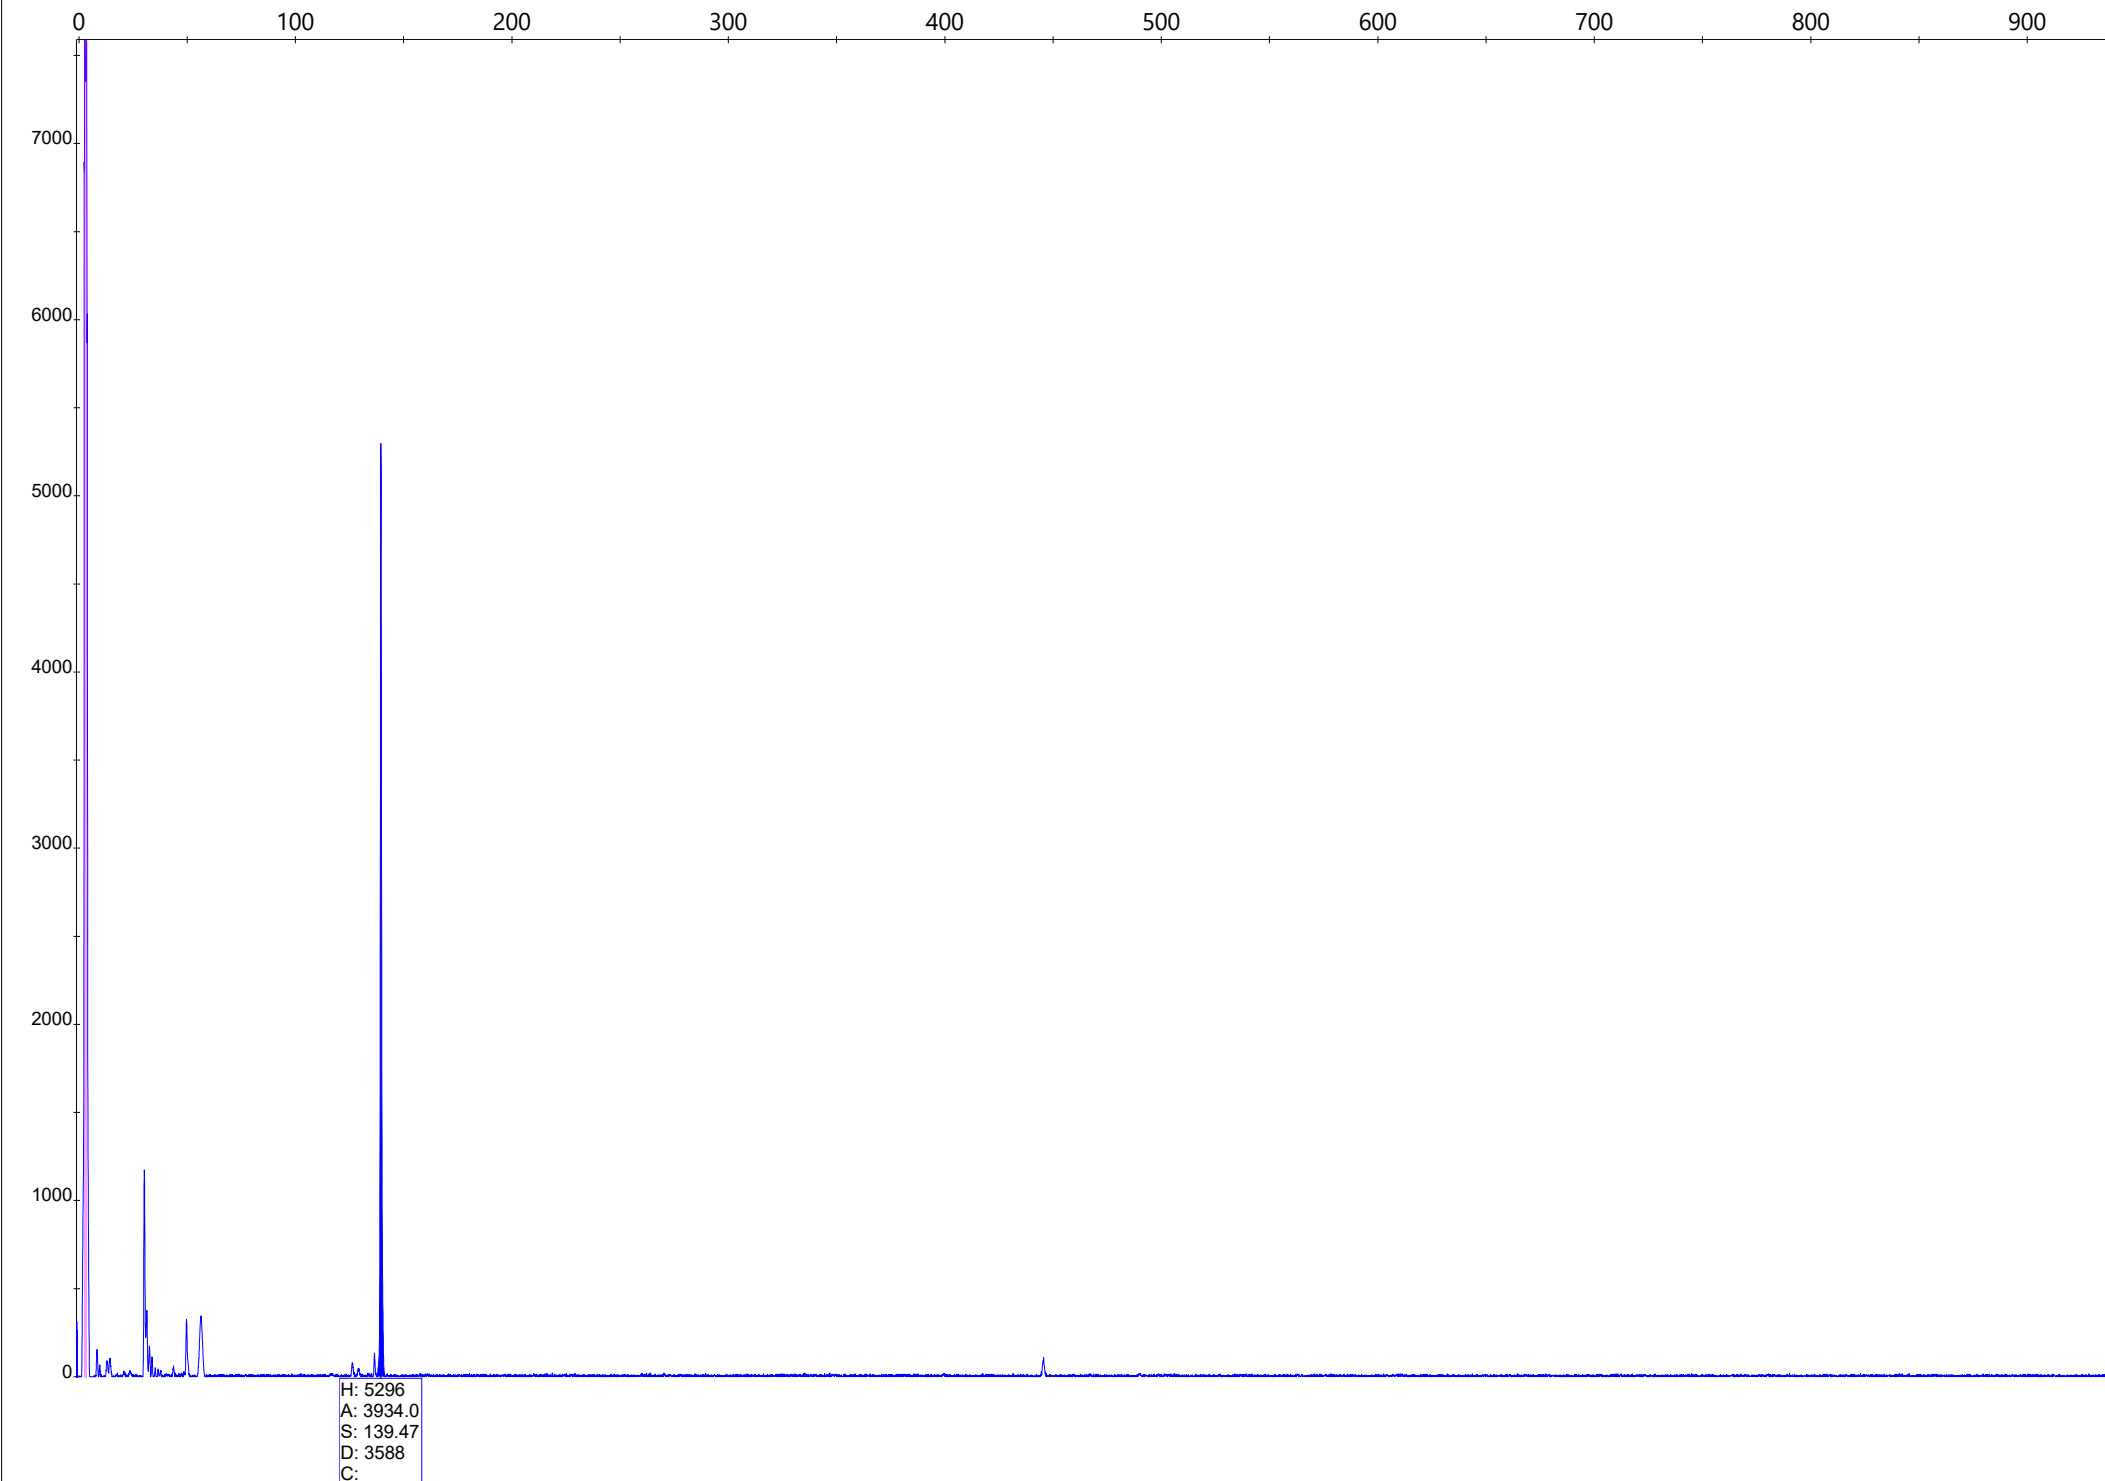

## Peak Scanner Software 2

3 C10\_AK5\_FonA-v50\_APG22\_PR0954.fsa

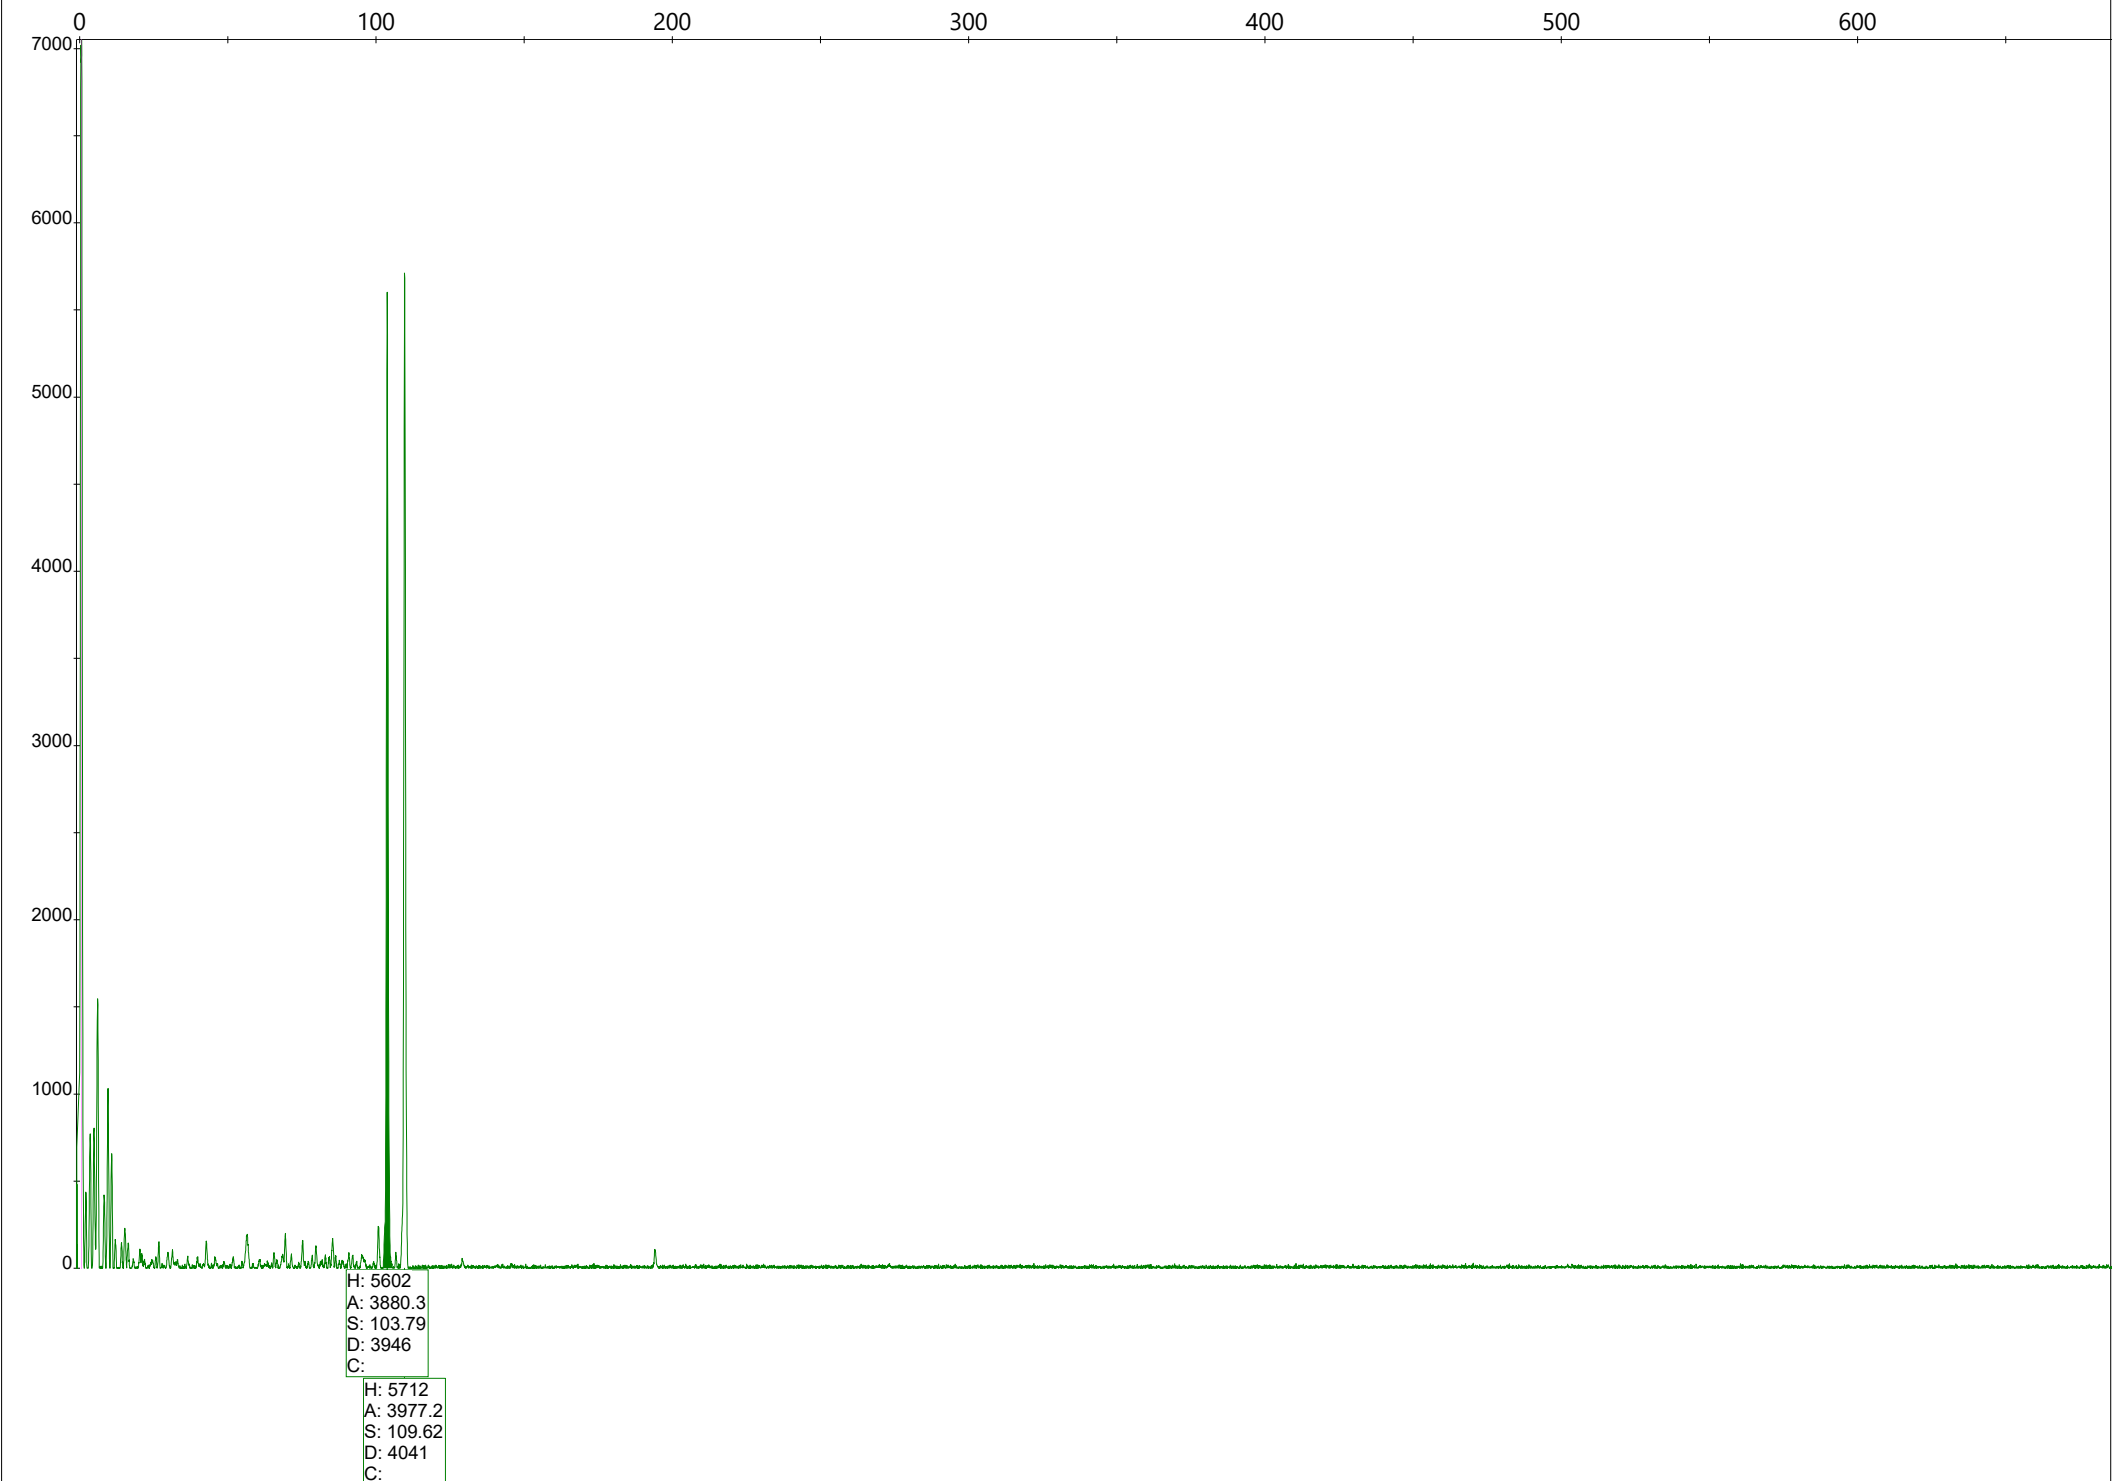

## Peak Scanner Software 2

4 E10\_AK7\_FonA-v50\_APG22\_PR0954.fsa

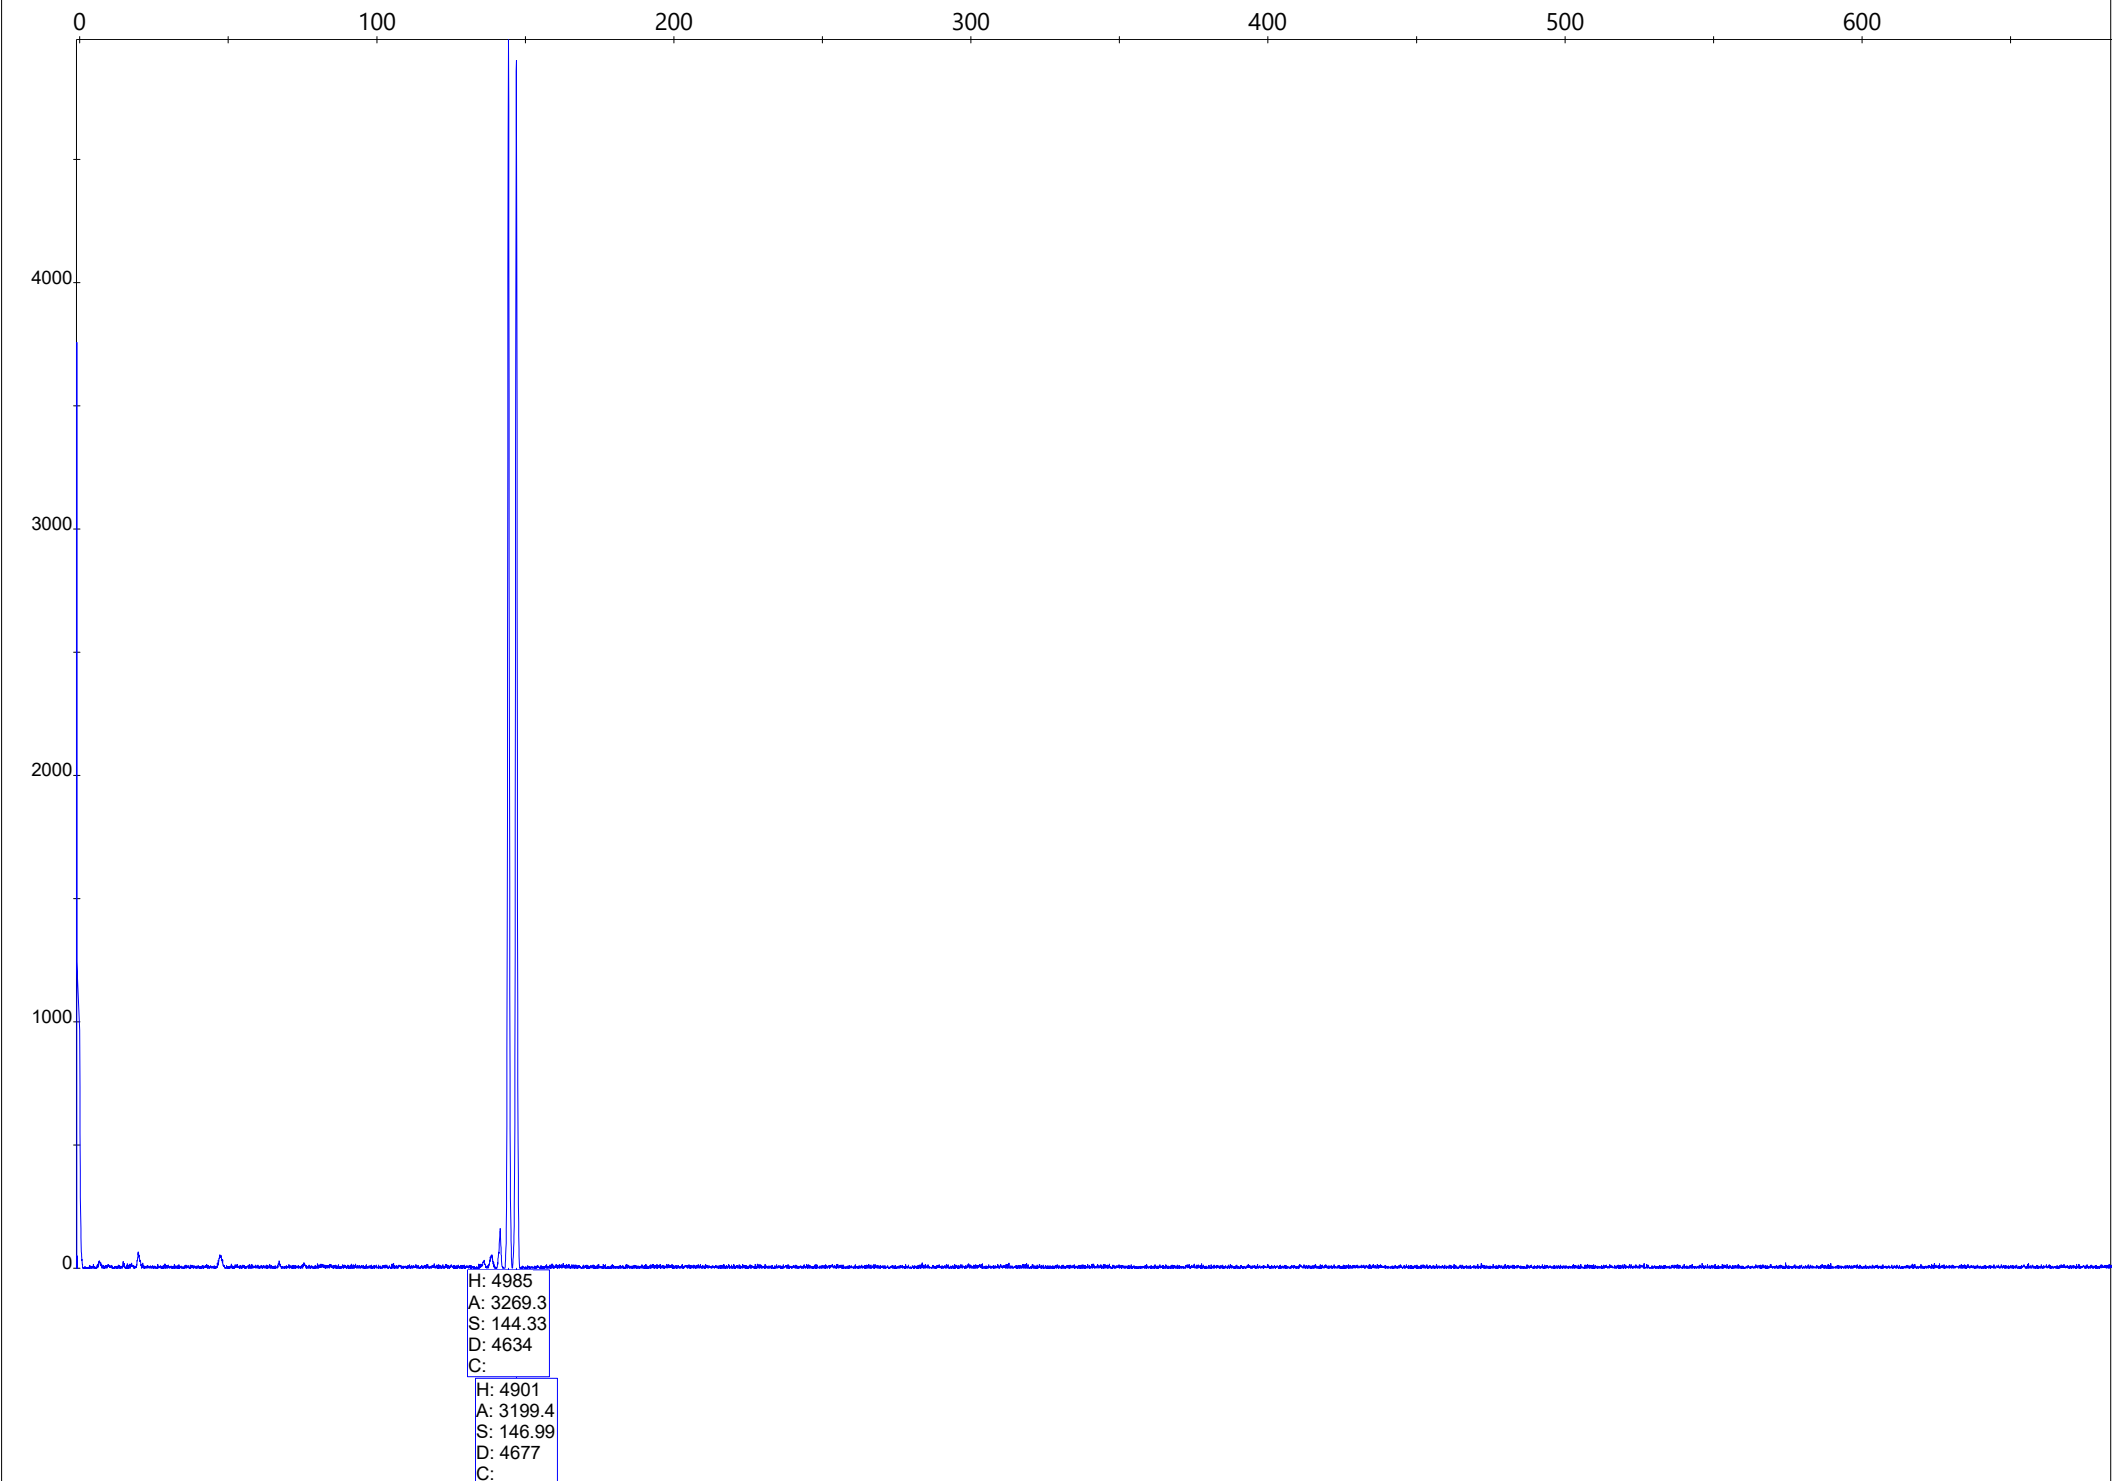

5 G10\_AK9\_FonA-v50\_APG22\_PR0954.fsa

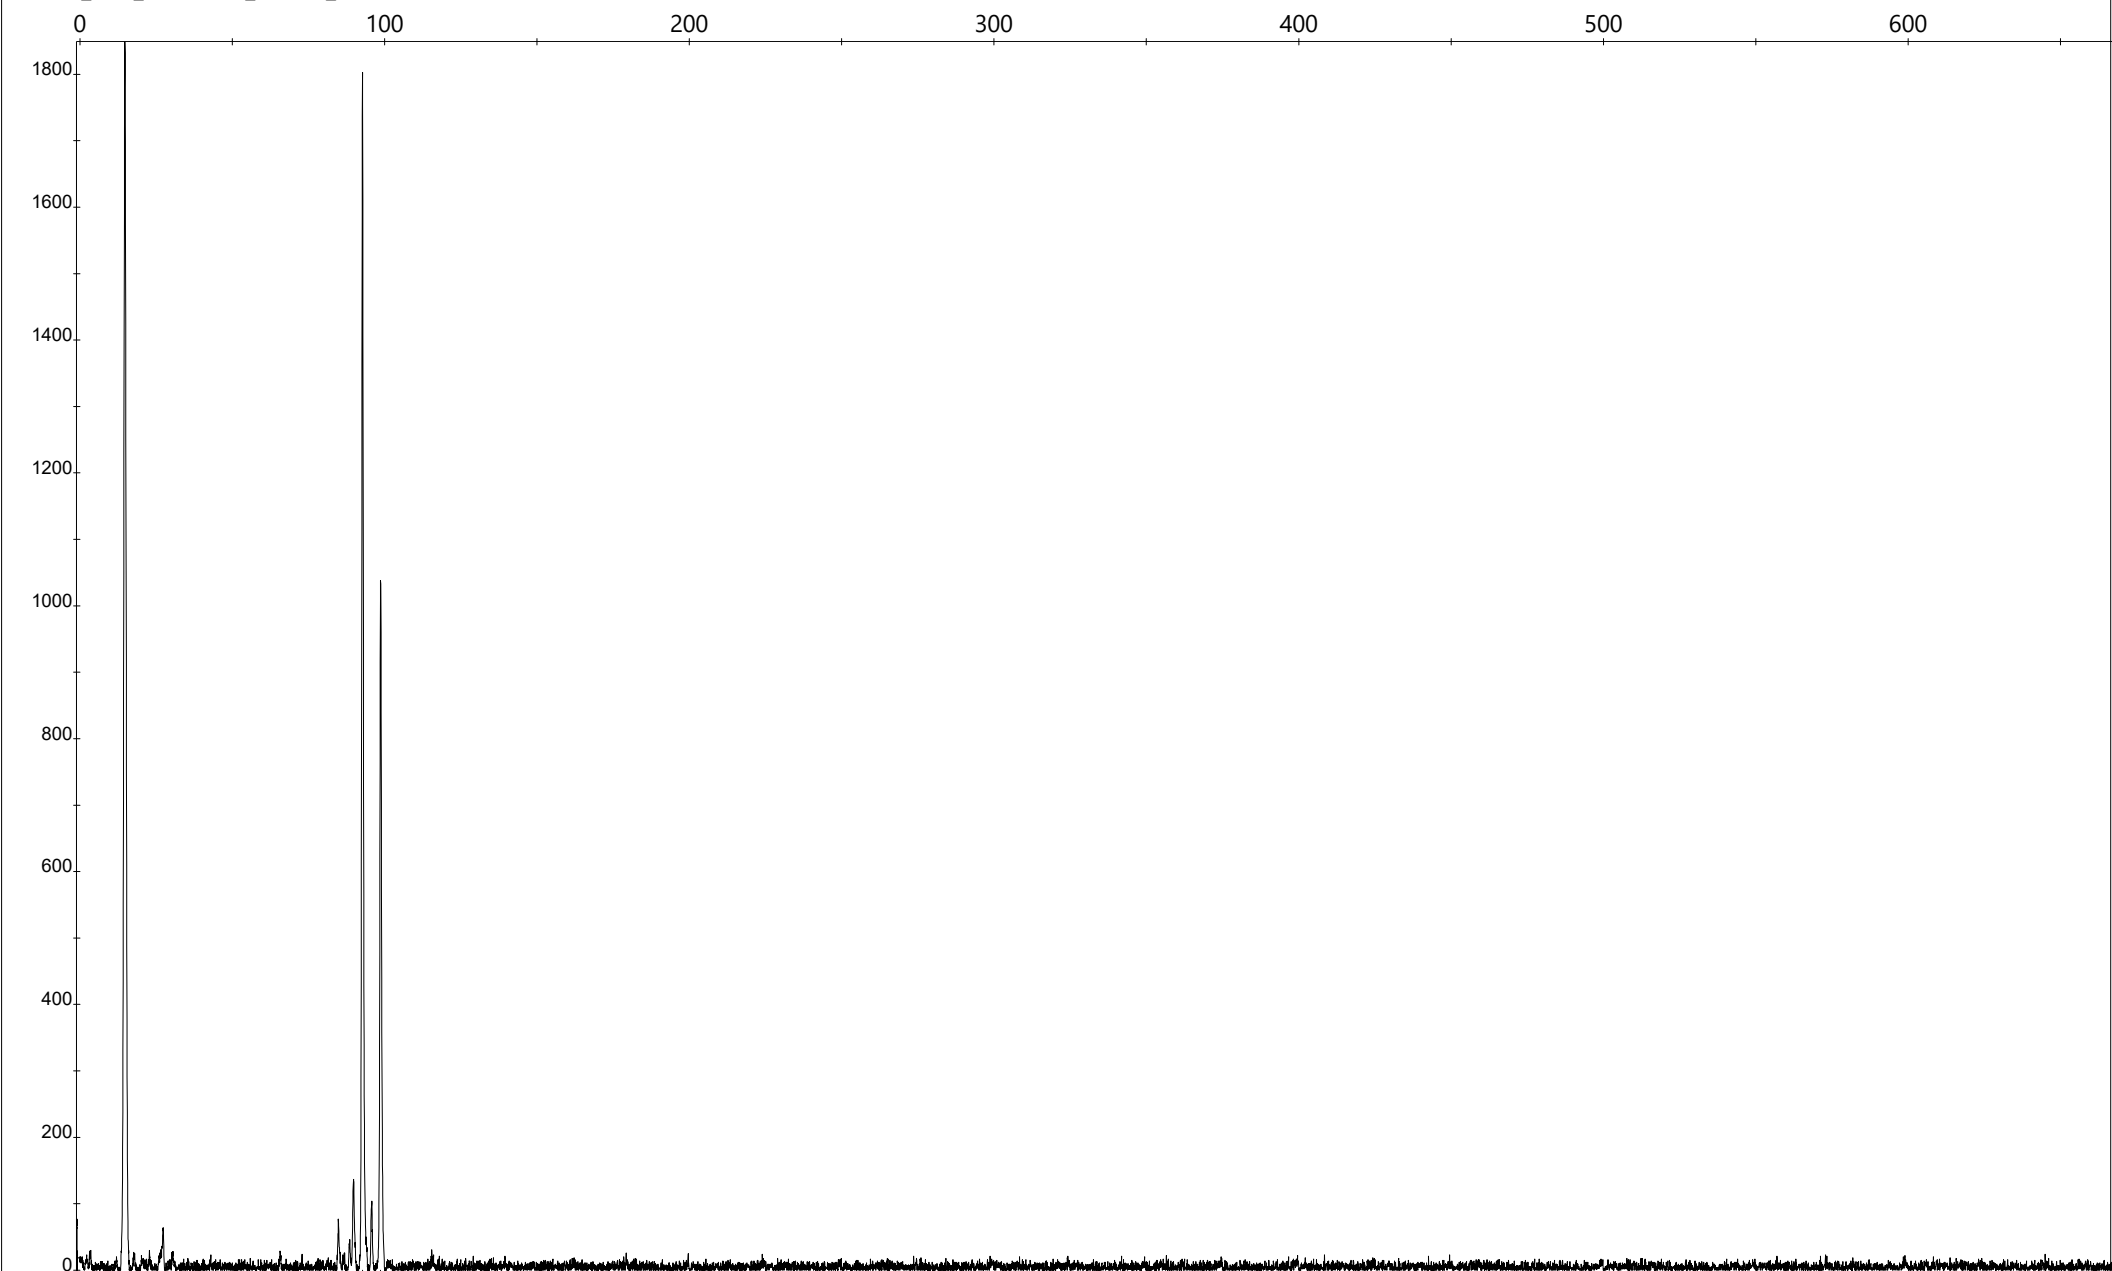

|           |
|-----------|
| H: 1803   |
| A: 1208.5 |
| S: 92.75  |
| D: 3820   |
| C:        |
| H: 1038   |
| A: 711.3  |
| S: 98.71  |
| D: 3922   |
| C:        |

6 E03\_AK10\_FonA-v20\_APG22\_PR0983.fsa

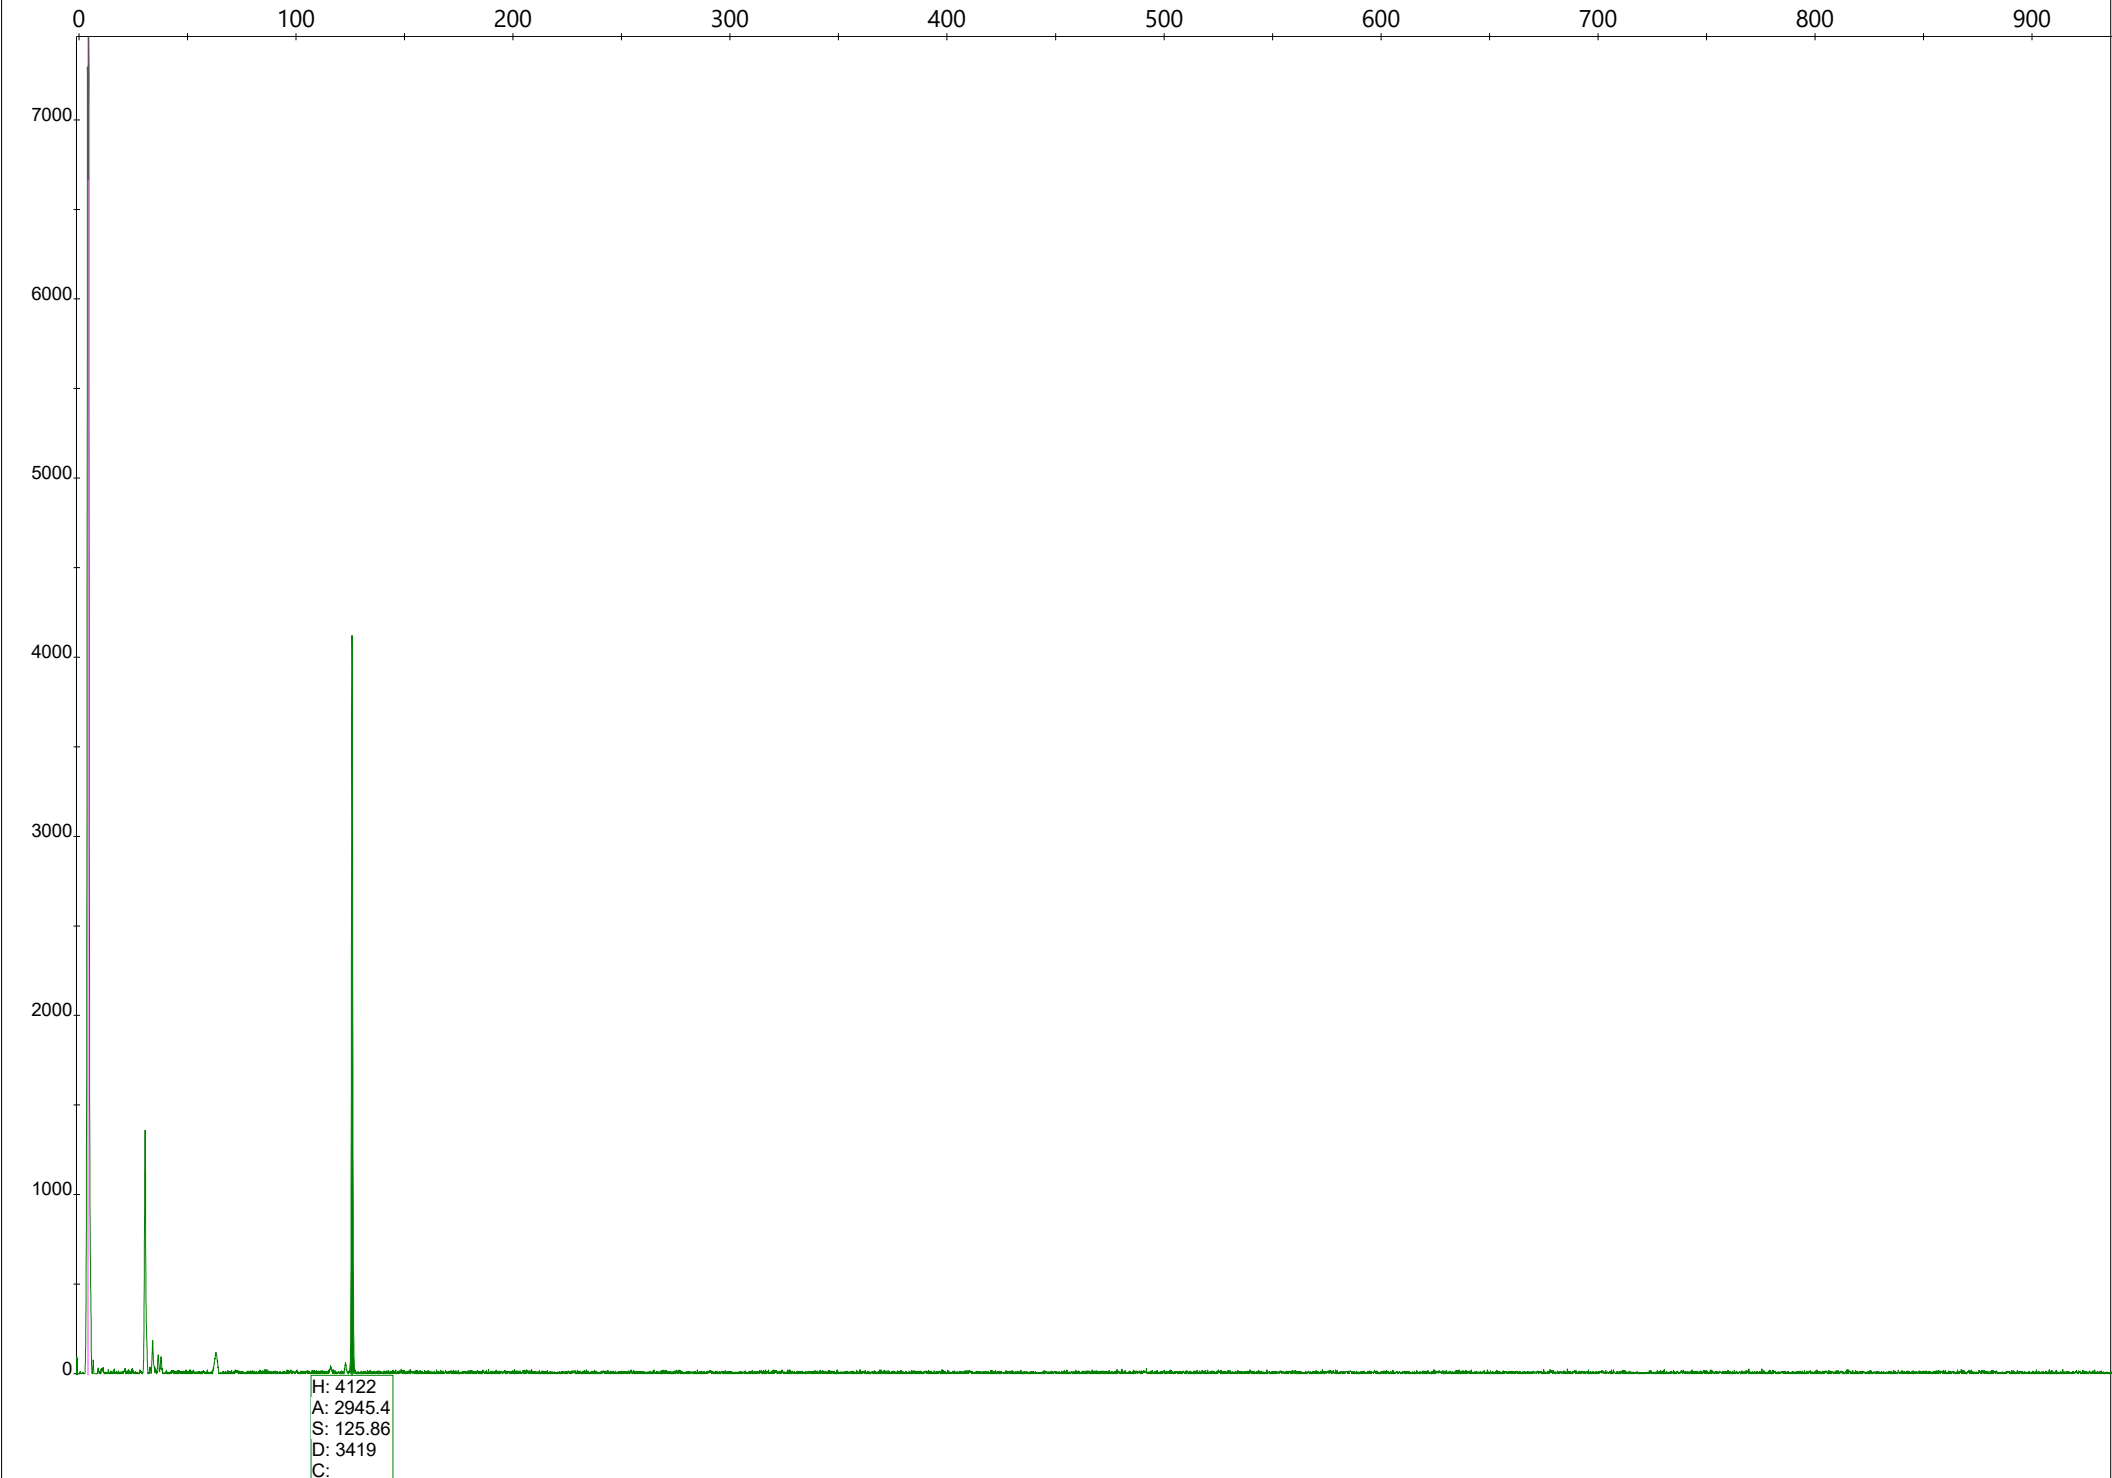

## Peak Scanner Software 2

7 A02\_AK12\_FonA-v50\_APG22\_PR0983.fsa

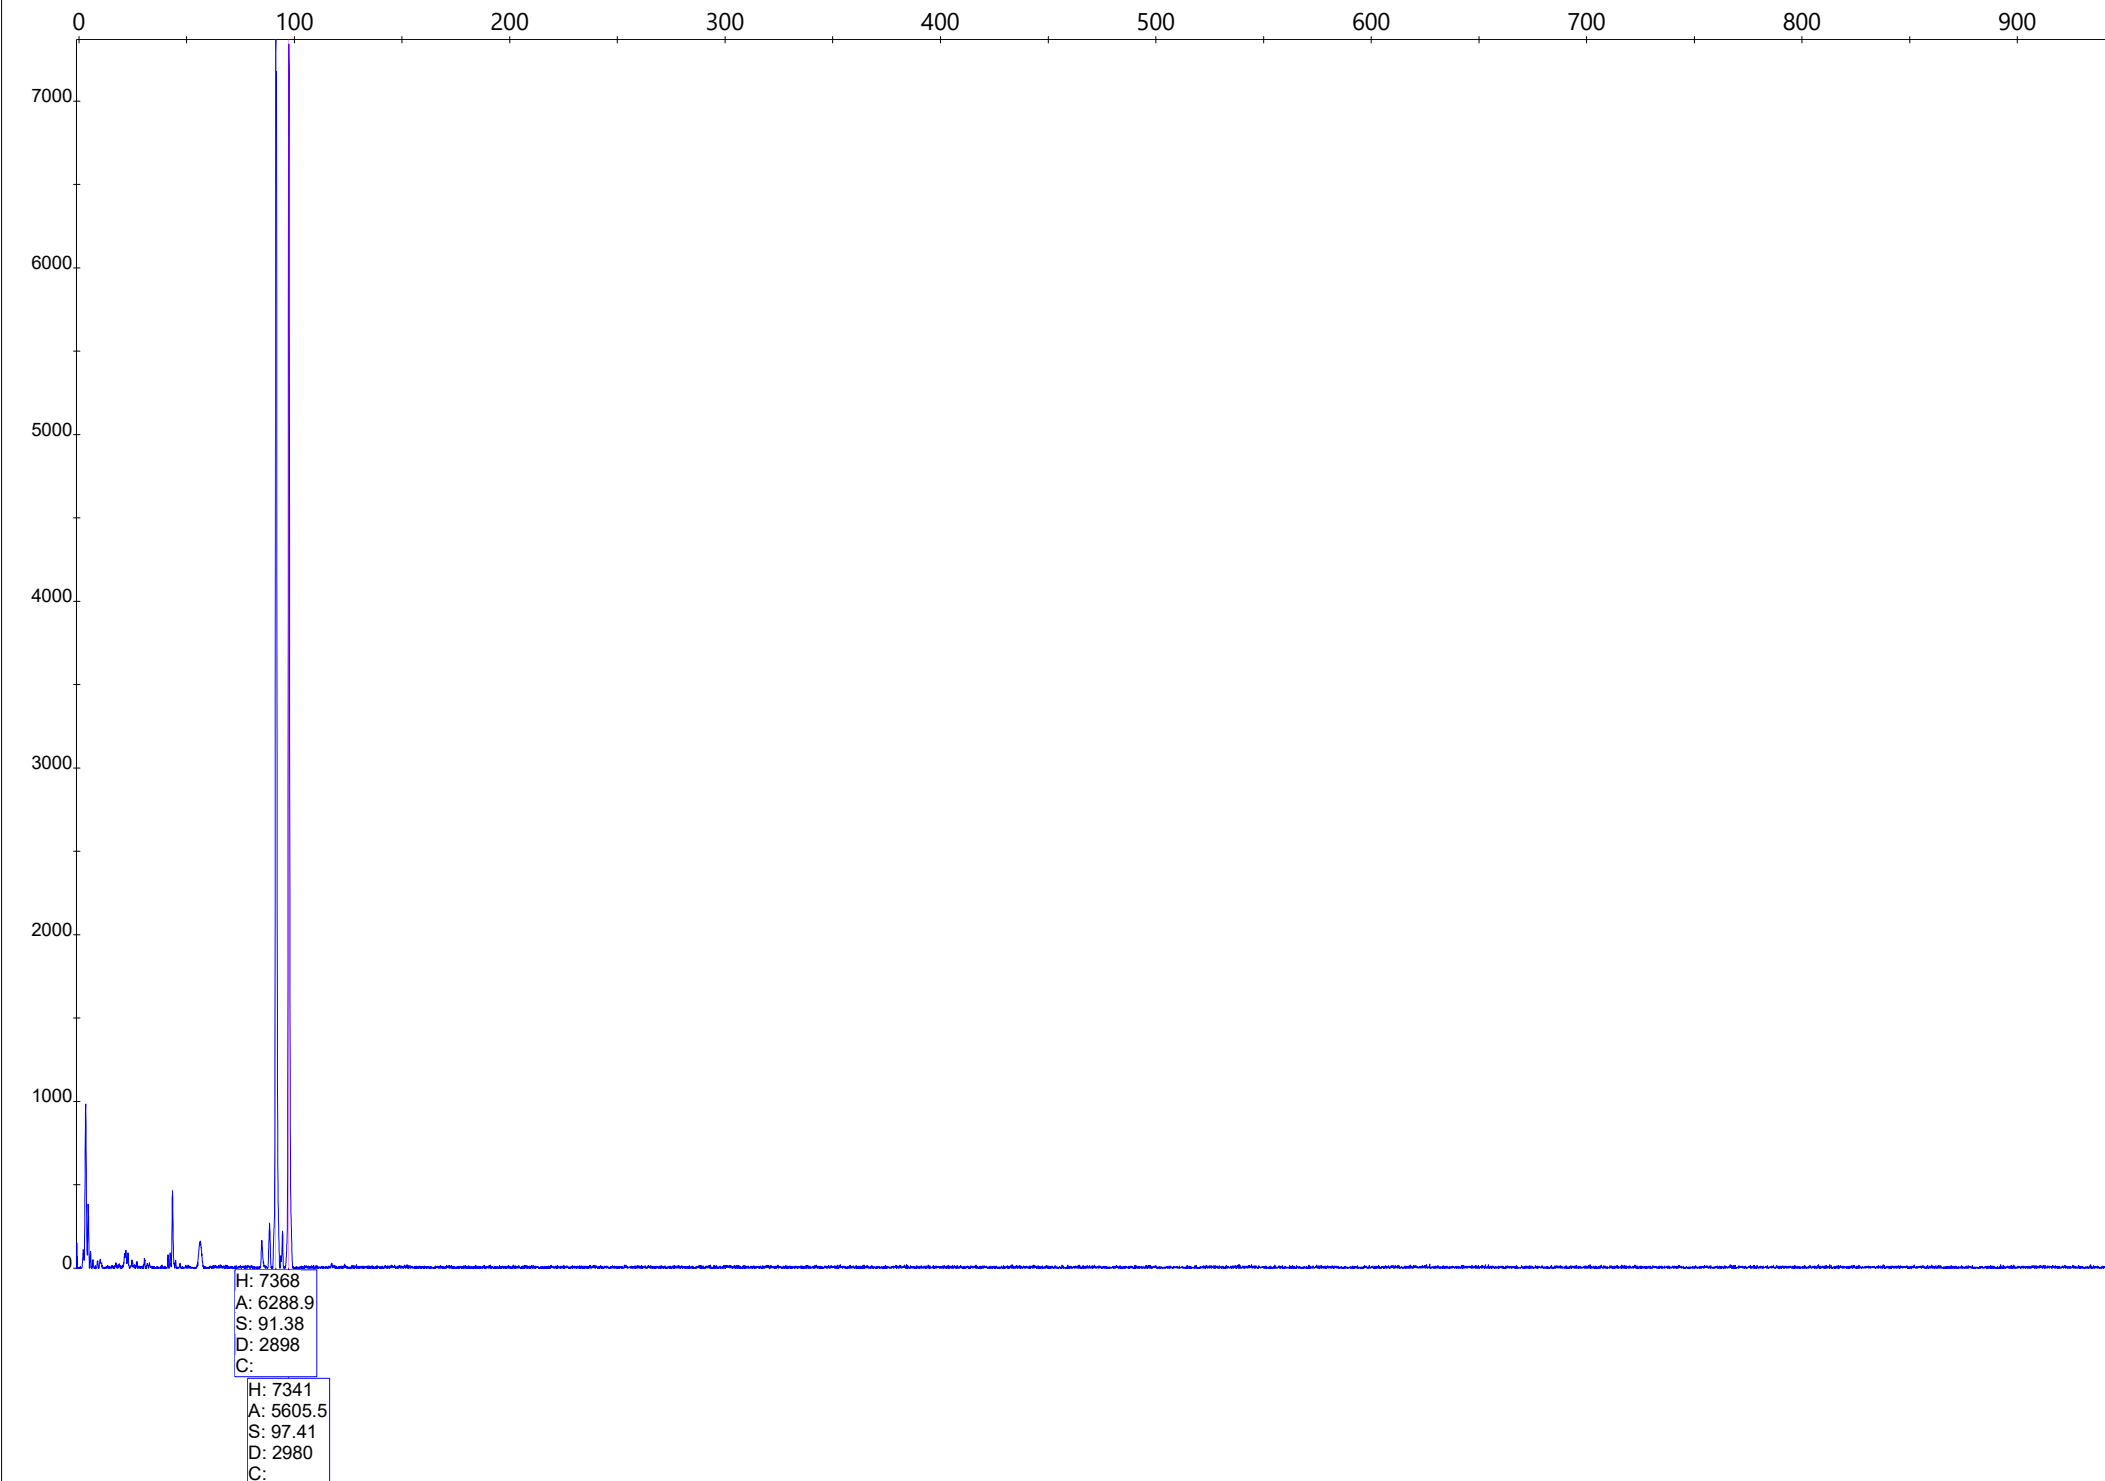

## Peak Scanner Software 2

8 C02\_AK13\_FonA-v50\_APG22\_PR0983.fsa

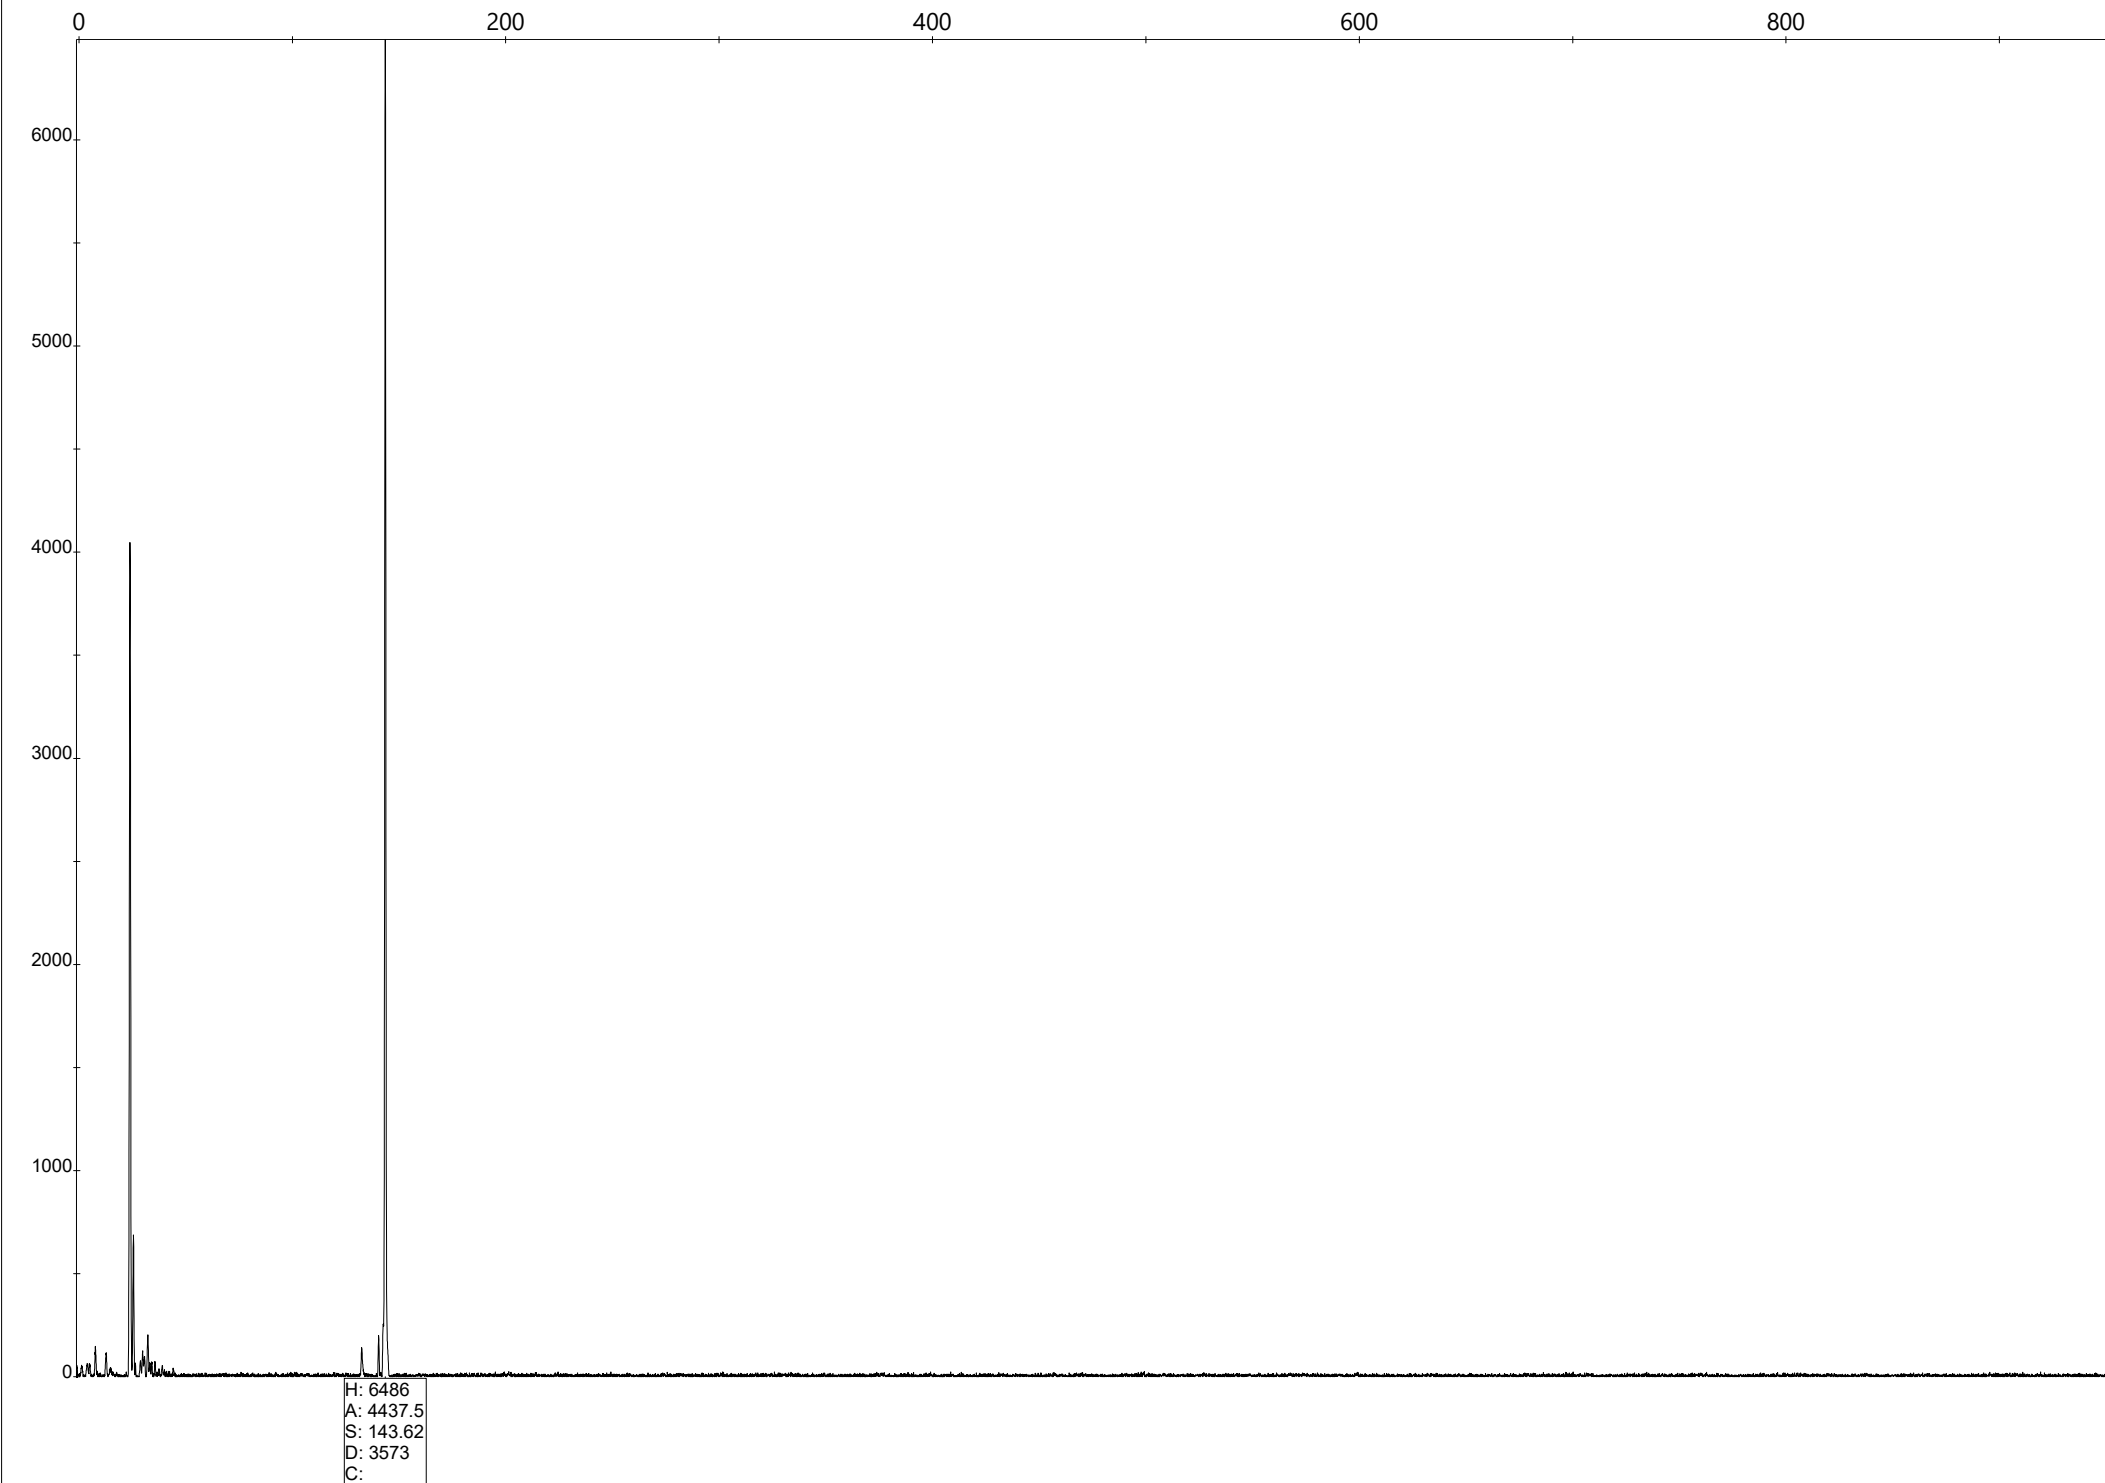



9 F11\_AK15\_FO2\_APG23\_PR0332.fsa

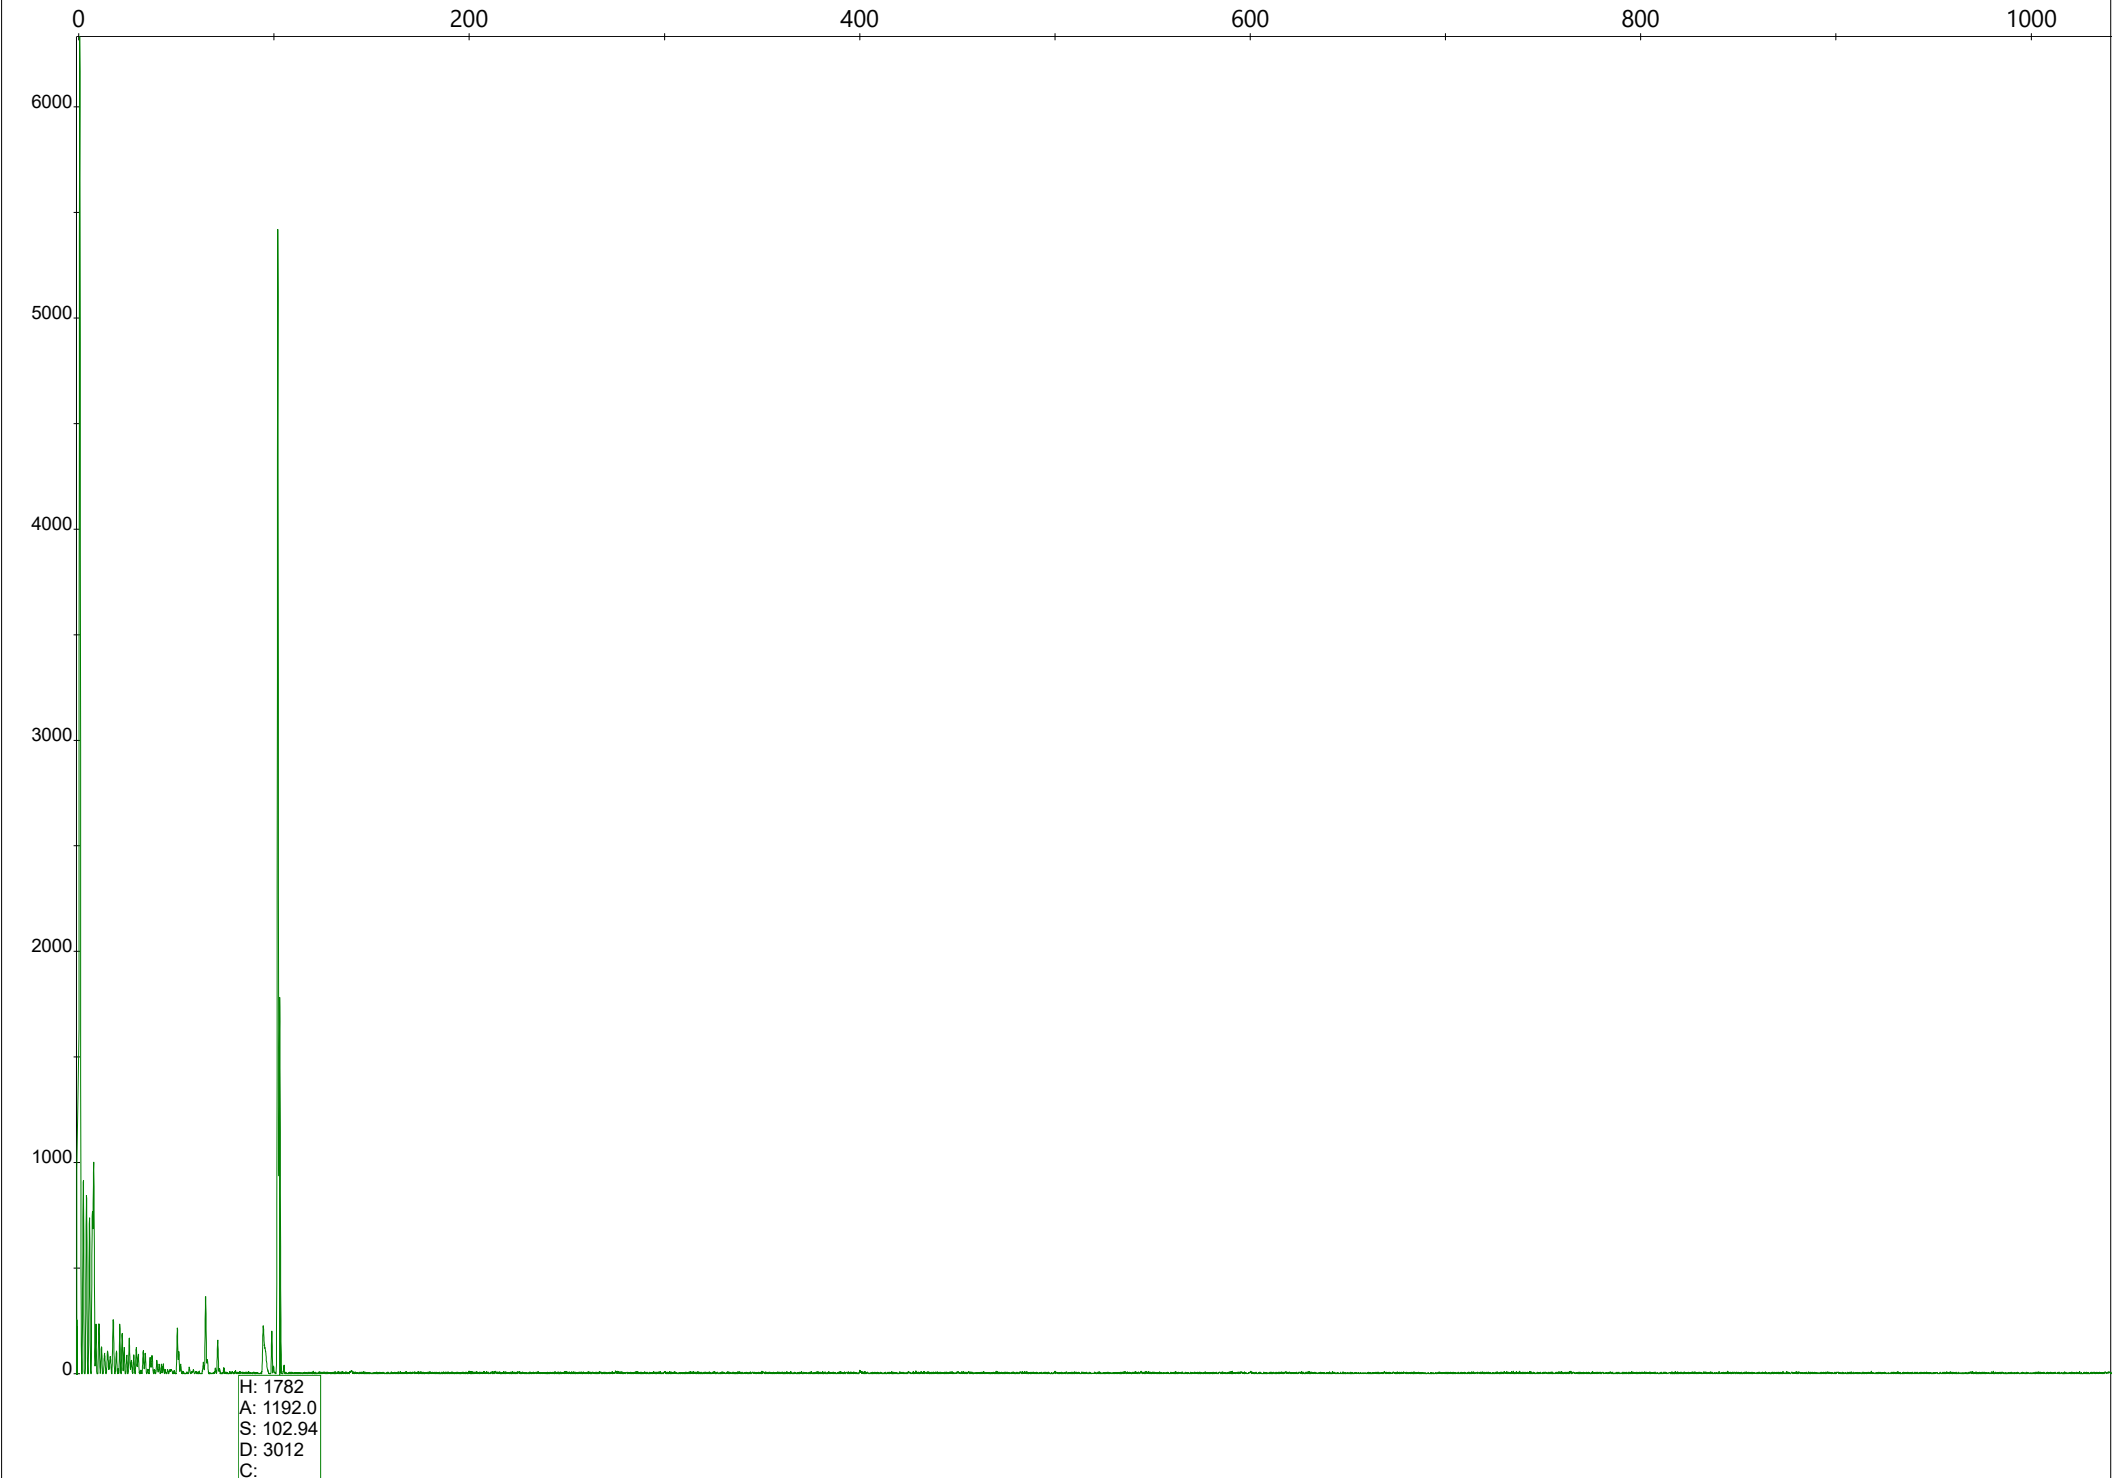

10 C10\_AK23\_FO1\_APG22\_PR1339.fsa

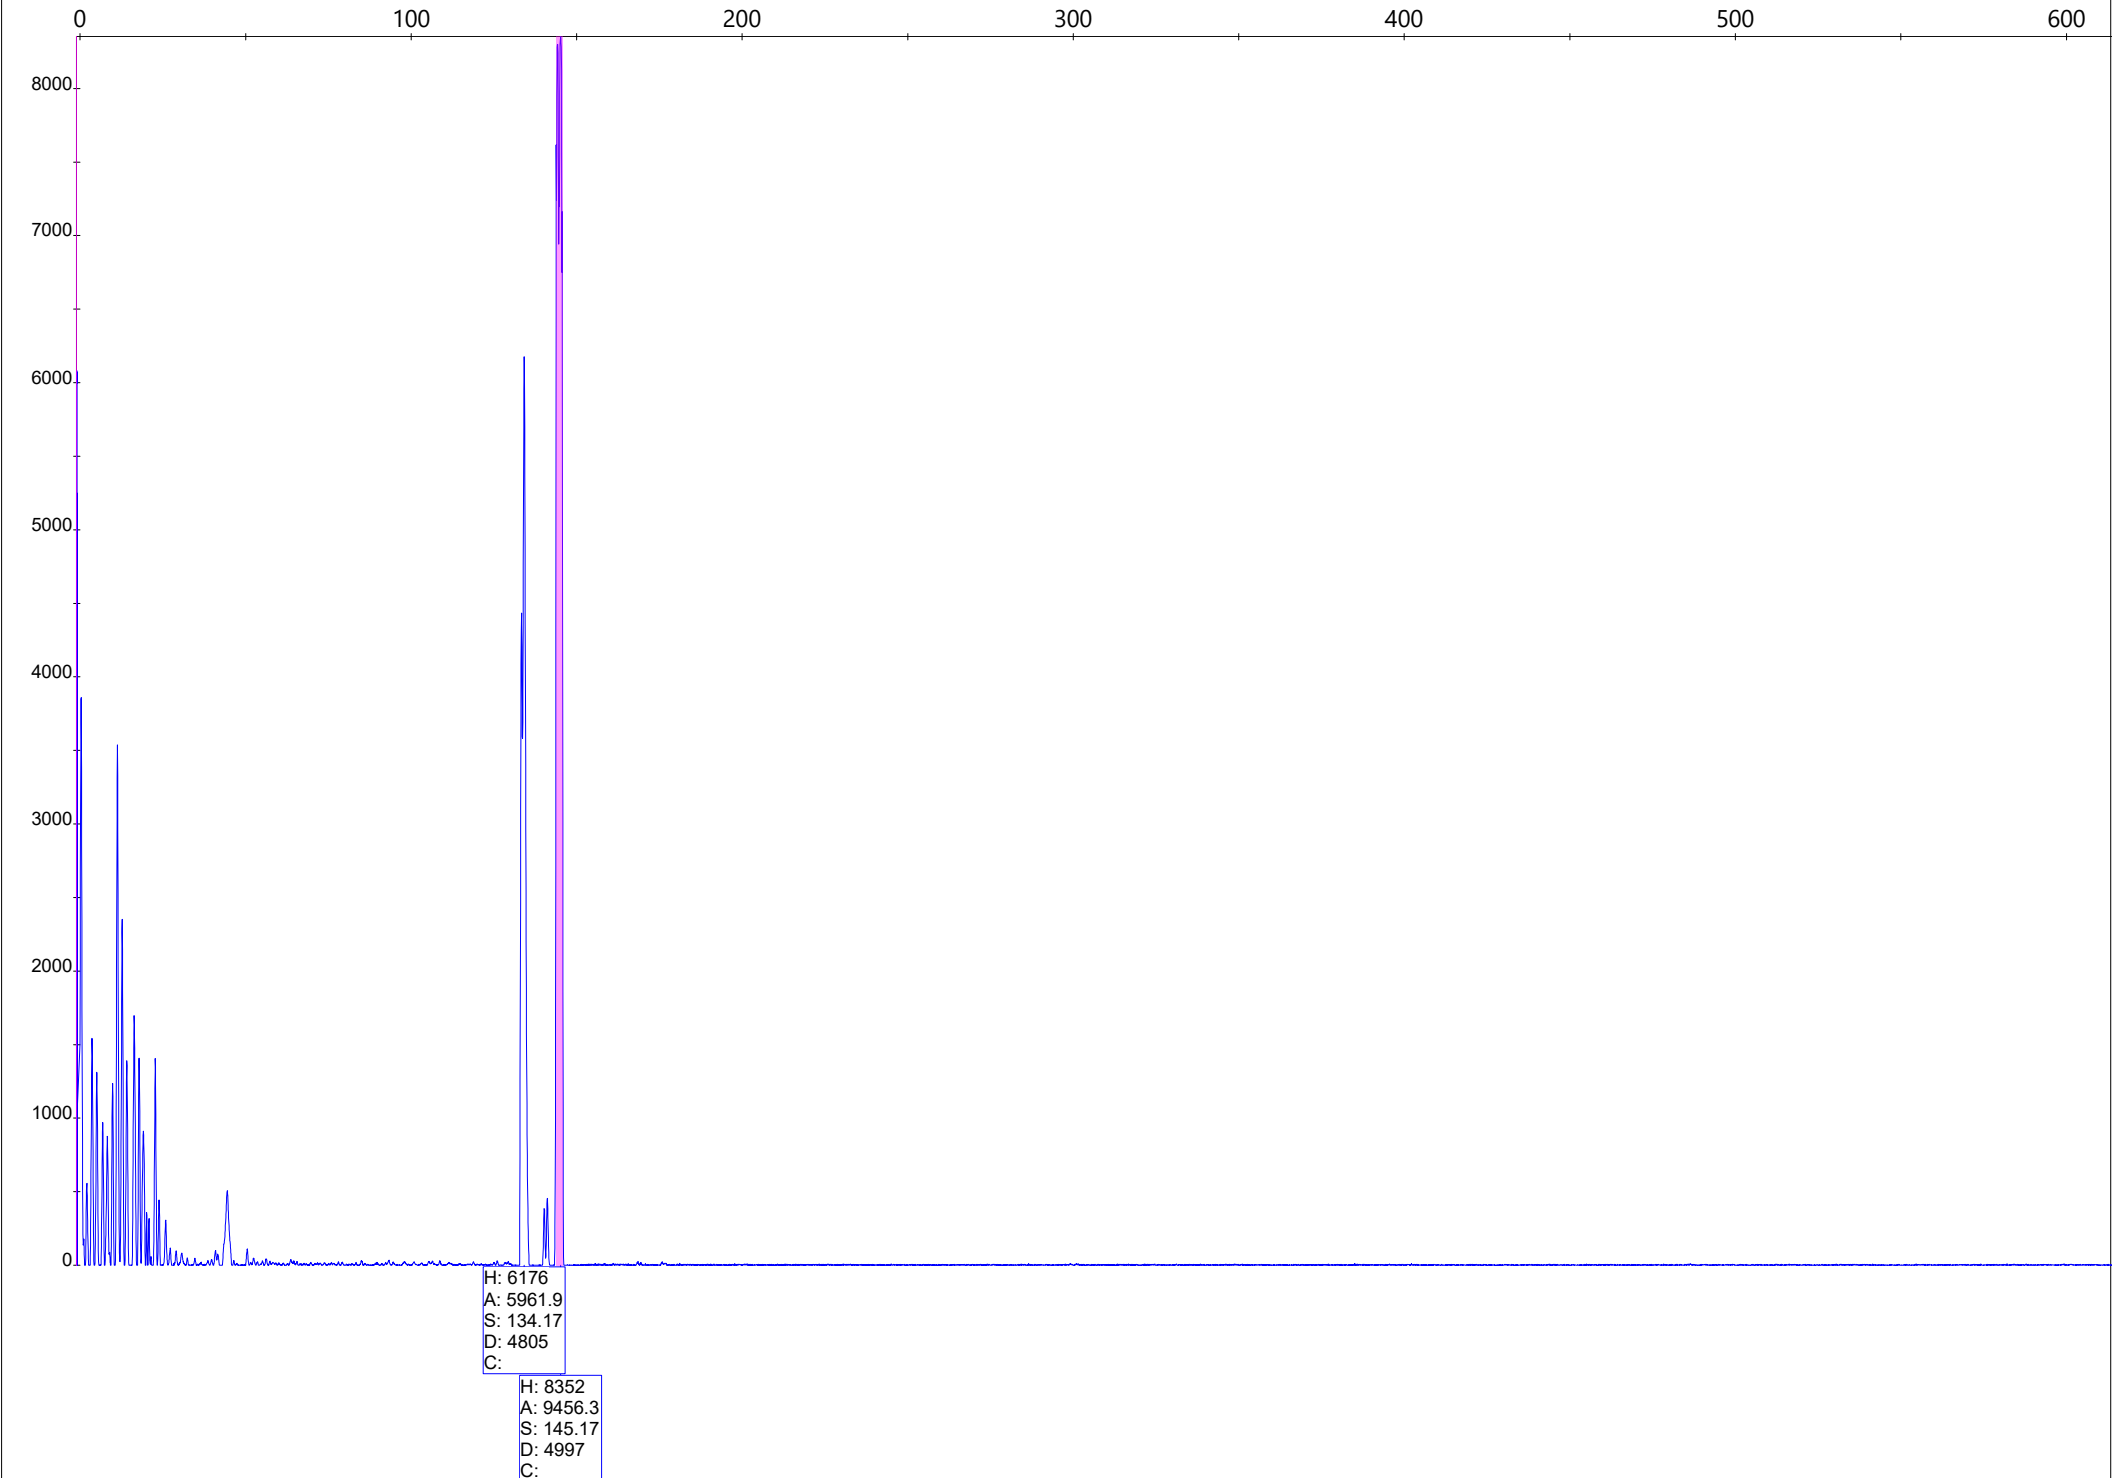

H: 6176  
A: 5961.9  
S: 134.17  
D: 4805  
C:  
H: 8352  
A: 9456.3  
S: 145.17  
D: 4997  
C:

11 D11\_AK28\_FO4\_APG22\_PR1651.fsa

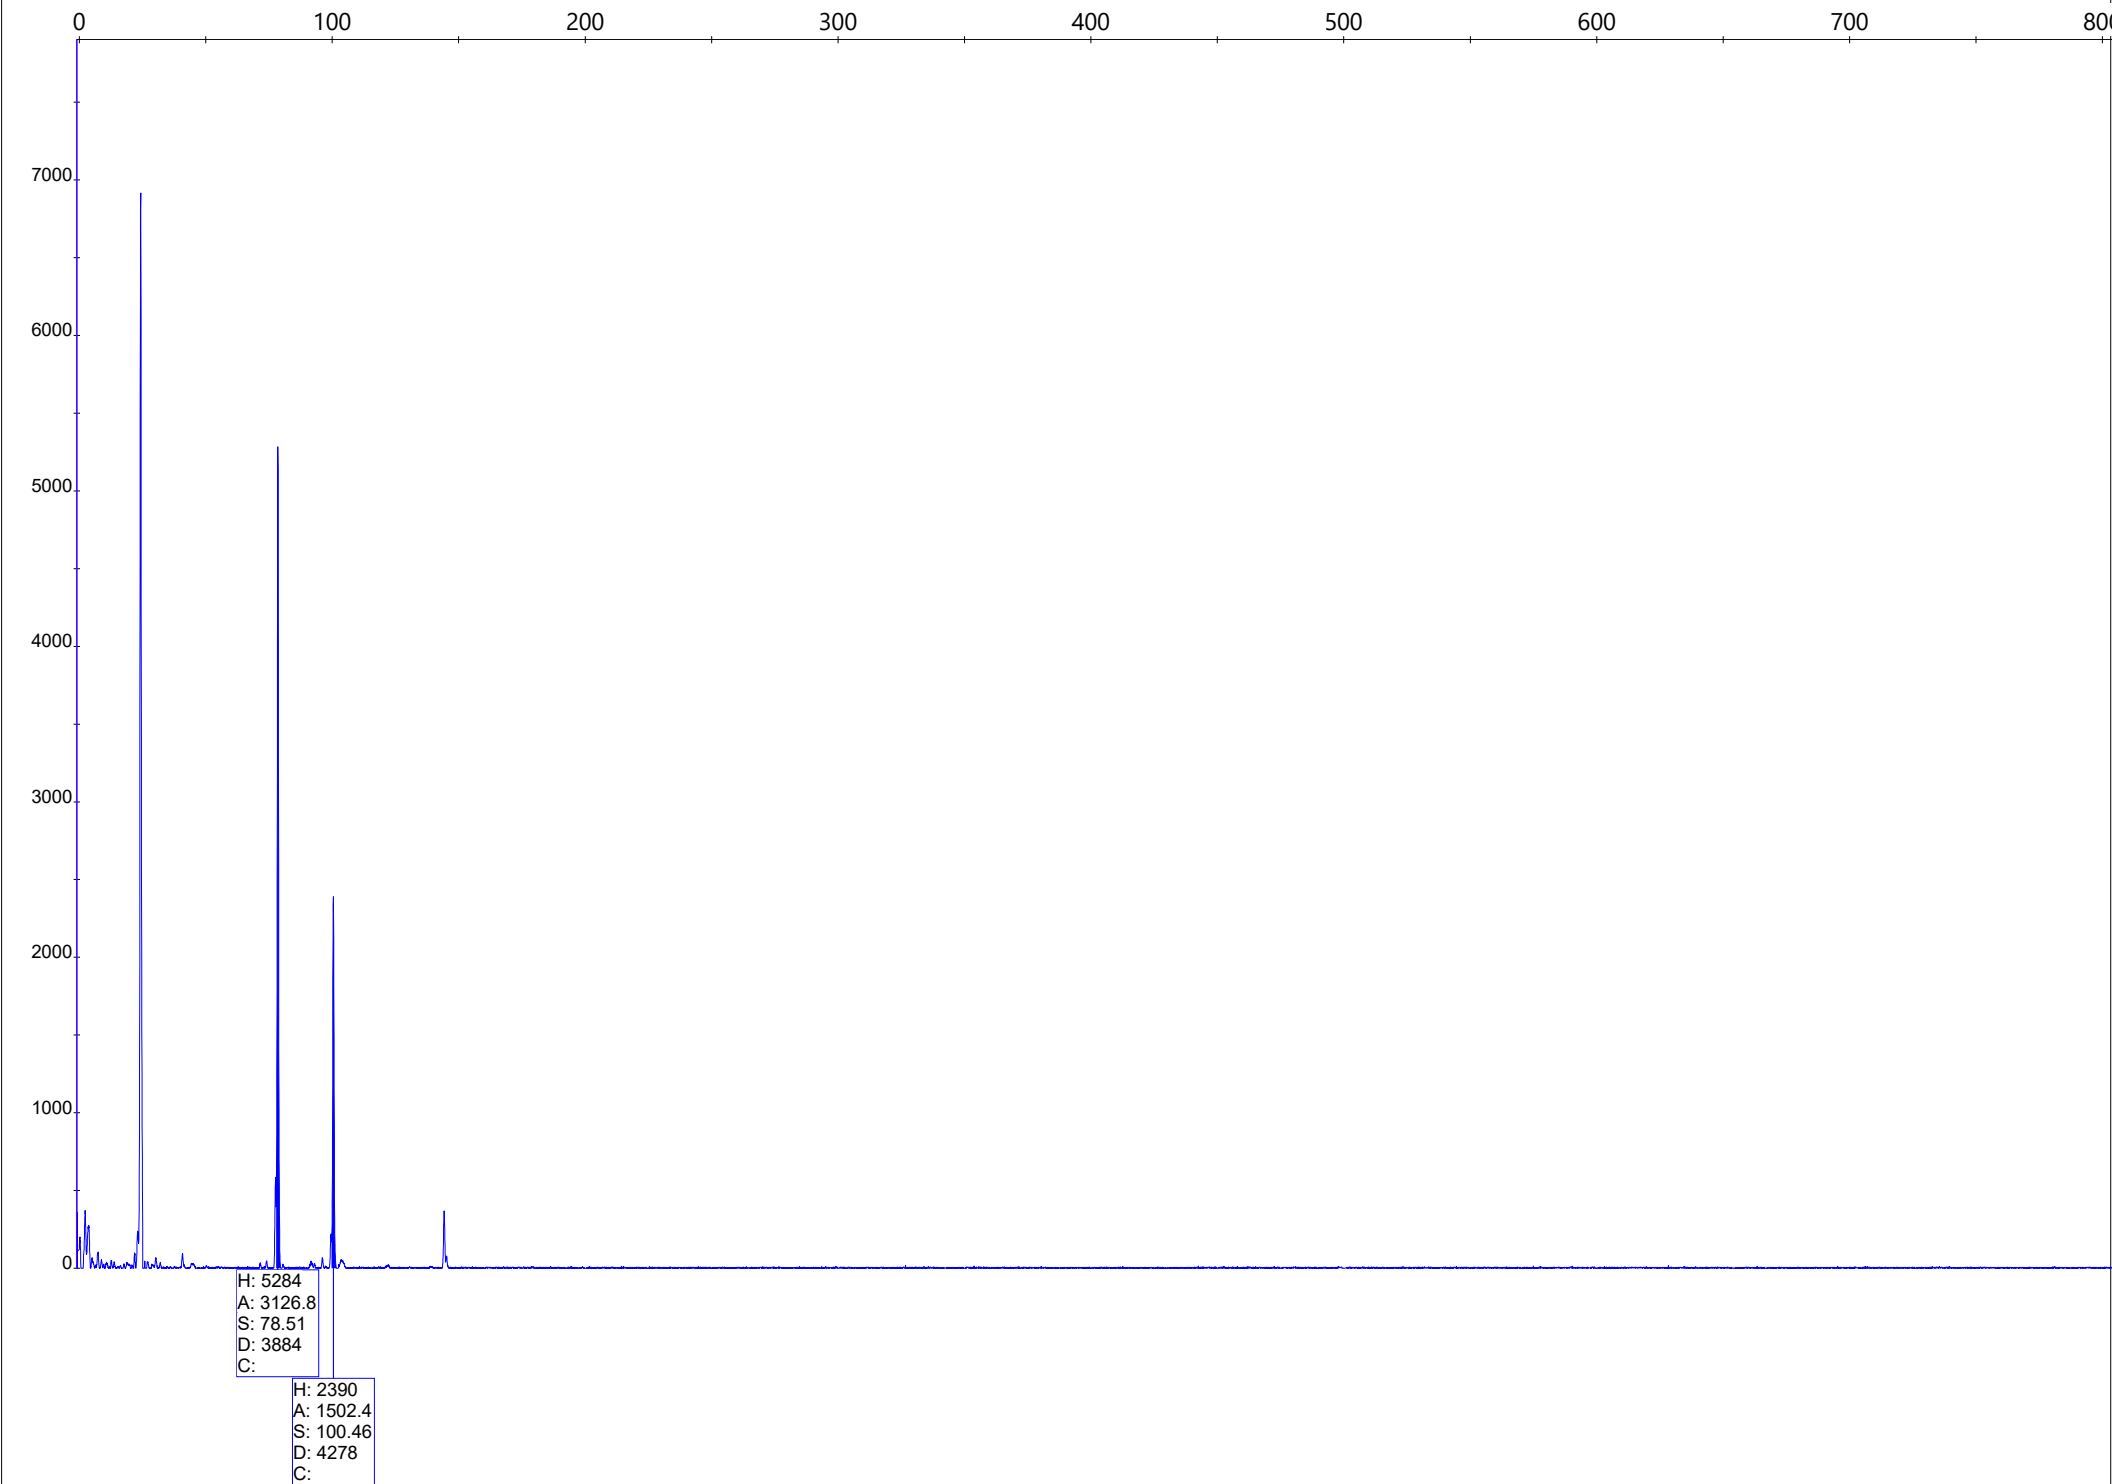

45 A01\_MultiA\_FO8\_APG22\_PR1426.fsa

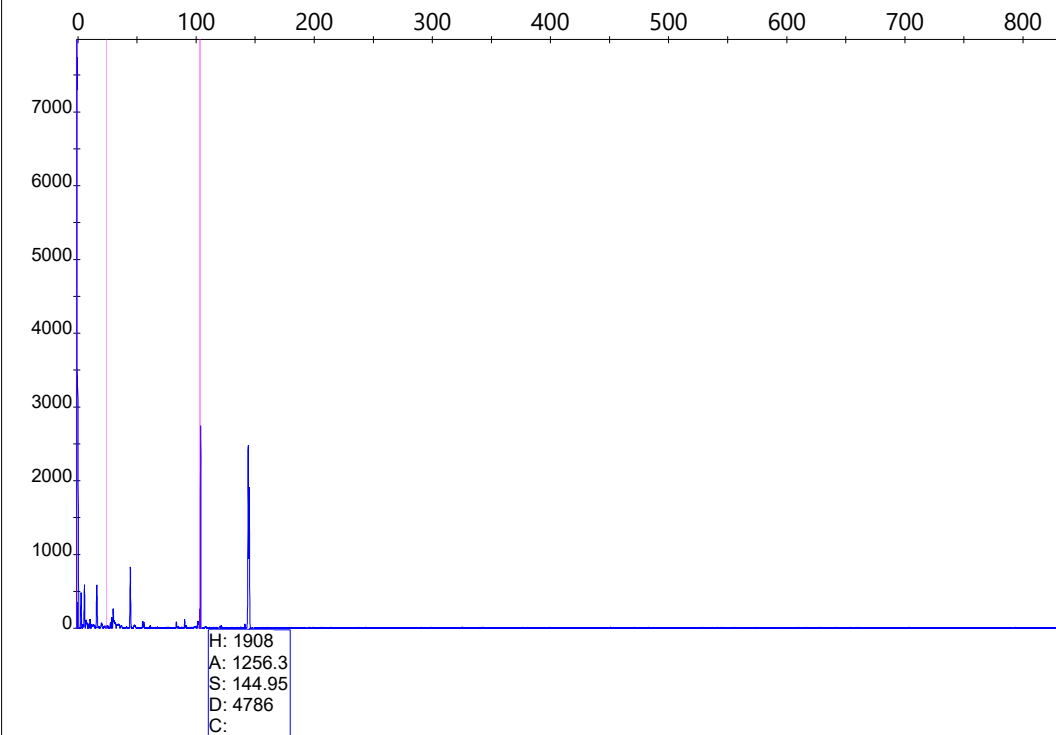

46 A01\_MultiA\_FO8\_APG22\_PR1426.fsa

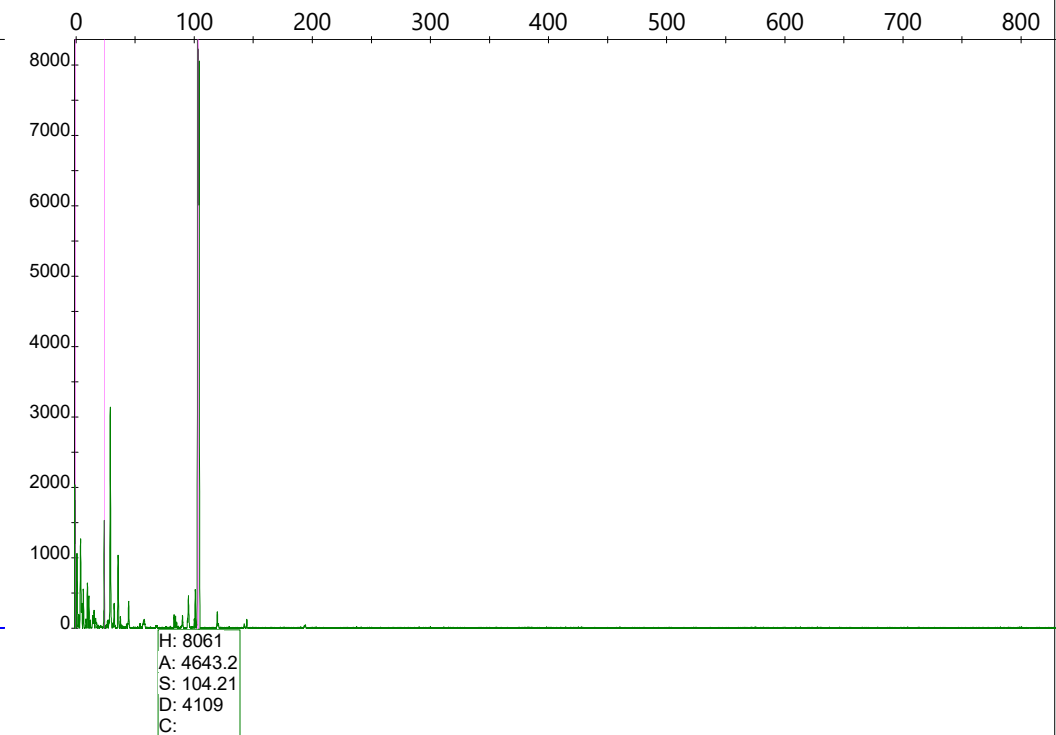

47 A01\_MultiA\_FO8\_APG22\_PR1426.fsa

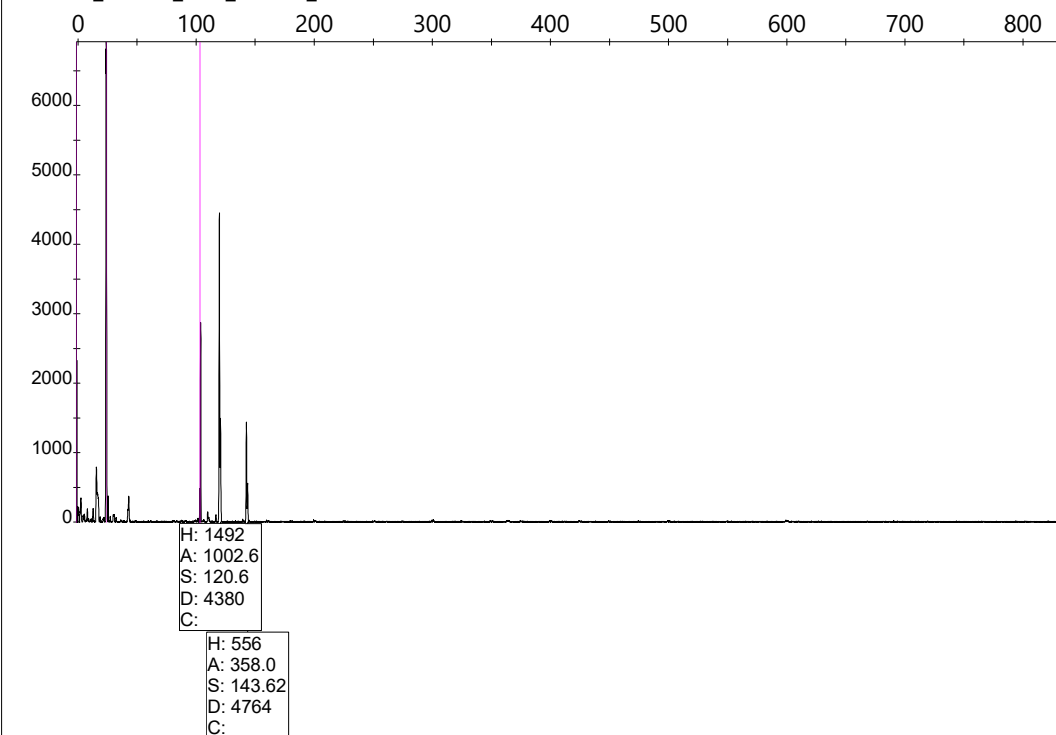

48 A01\_MultiA\_FO8\_APG22\_PR1426.fsa

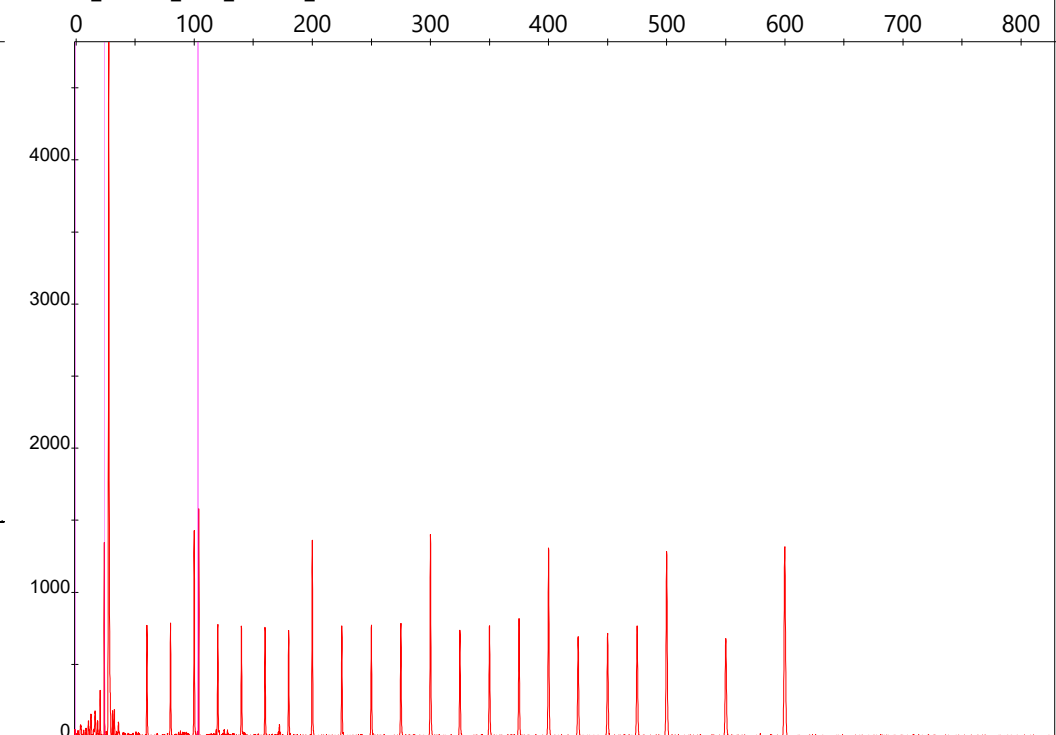

Peak Scanner Software 2

49 D12\_MultiB\_FO6\_APG22\_PR1651.fsa

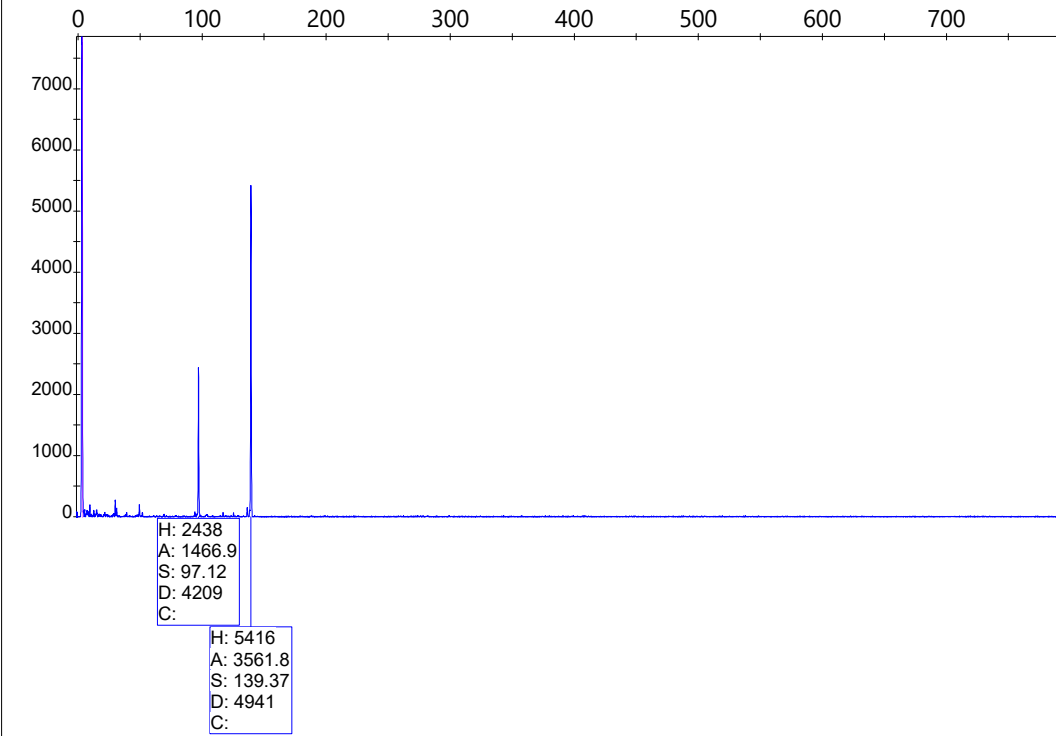

50 D12\_MultiB\_FO6\_APG22\_PR1651.fsa

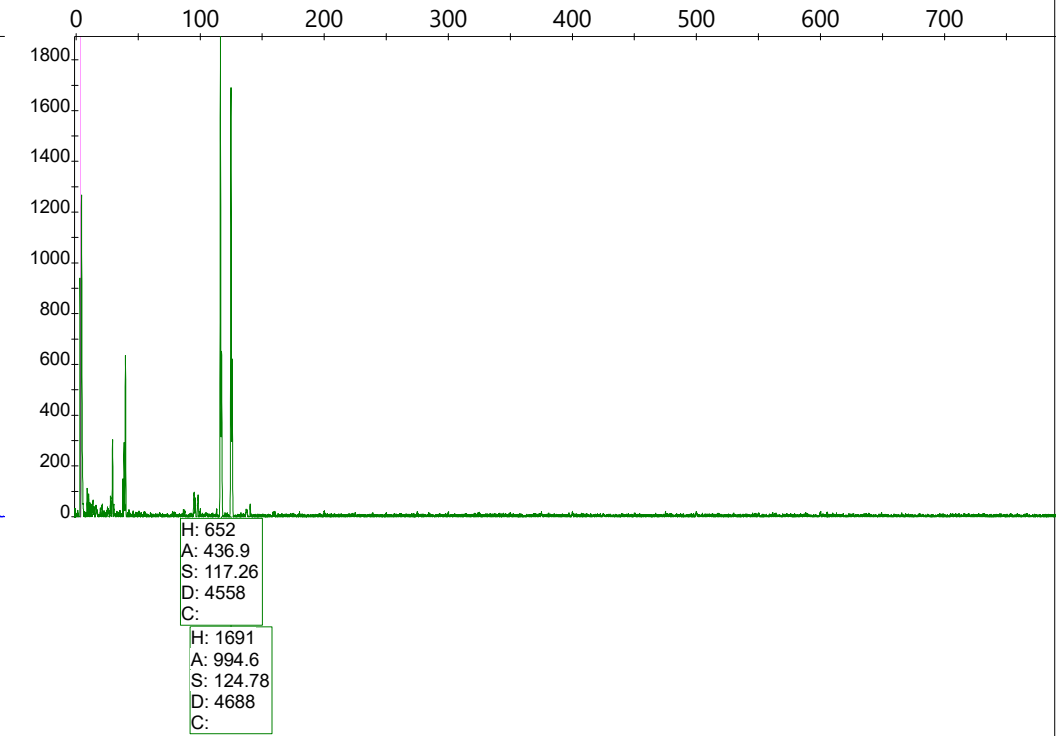

51 D12\_MultiB\_FO6\_APG22\_PR1651.fsa

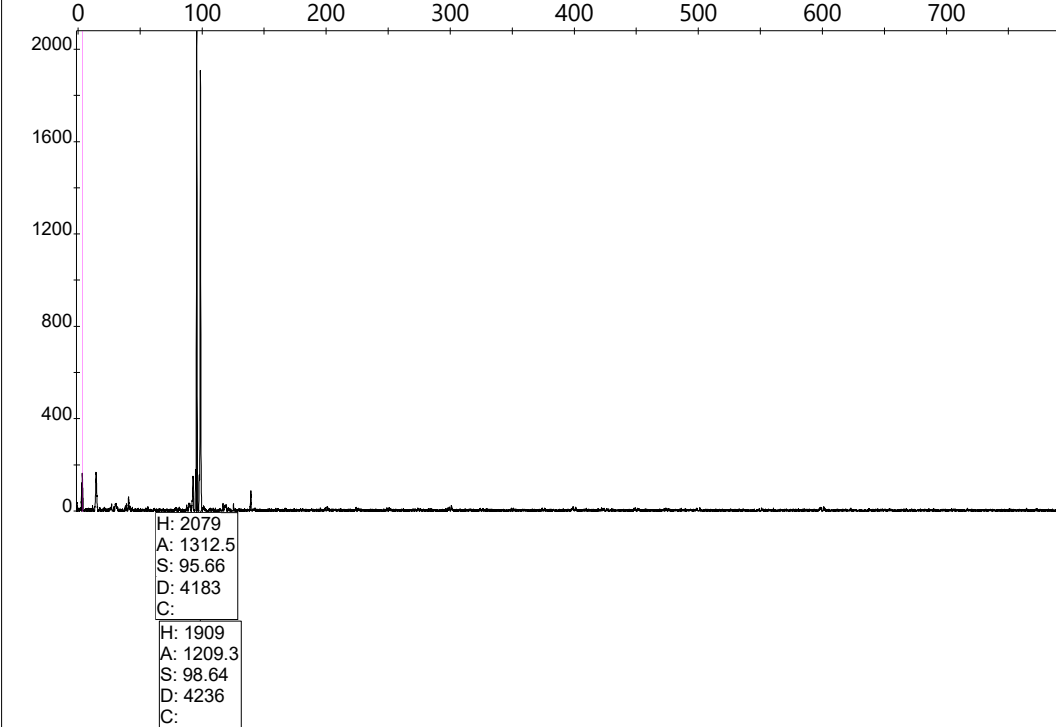

52 D12\_MultiB\_FO6\_APG22\_PR1651.fsa

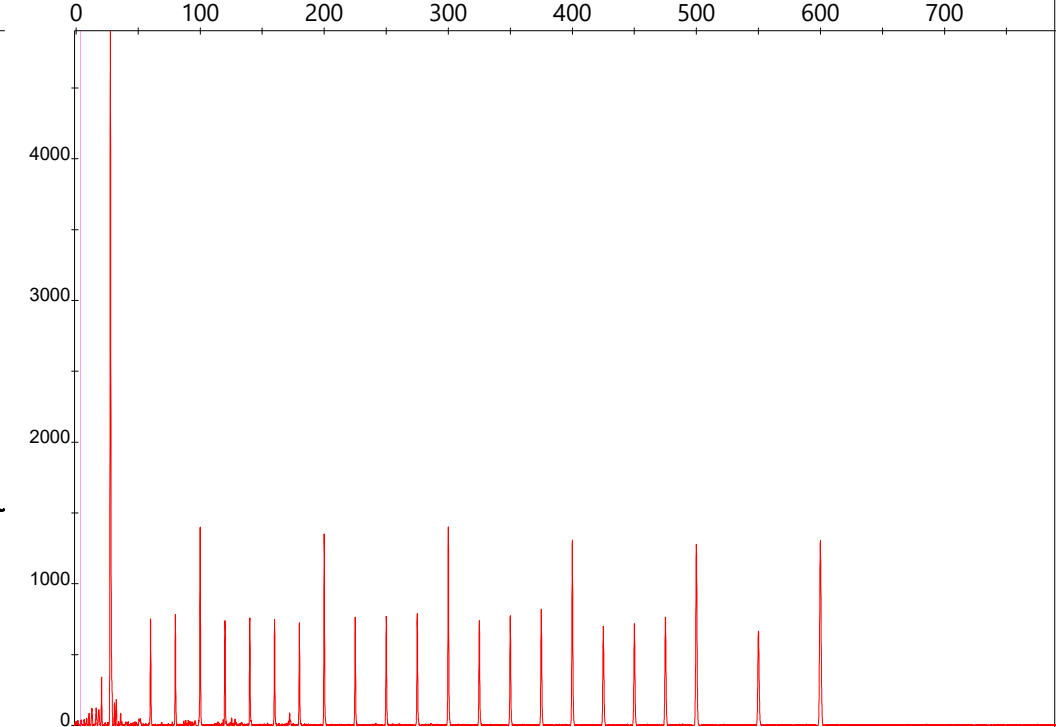

53 A10\_MultiC\_FO3\_APG23\_PR0643.fsa

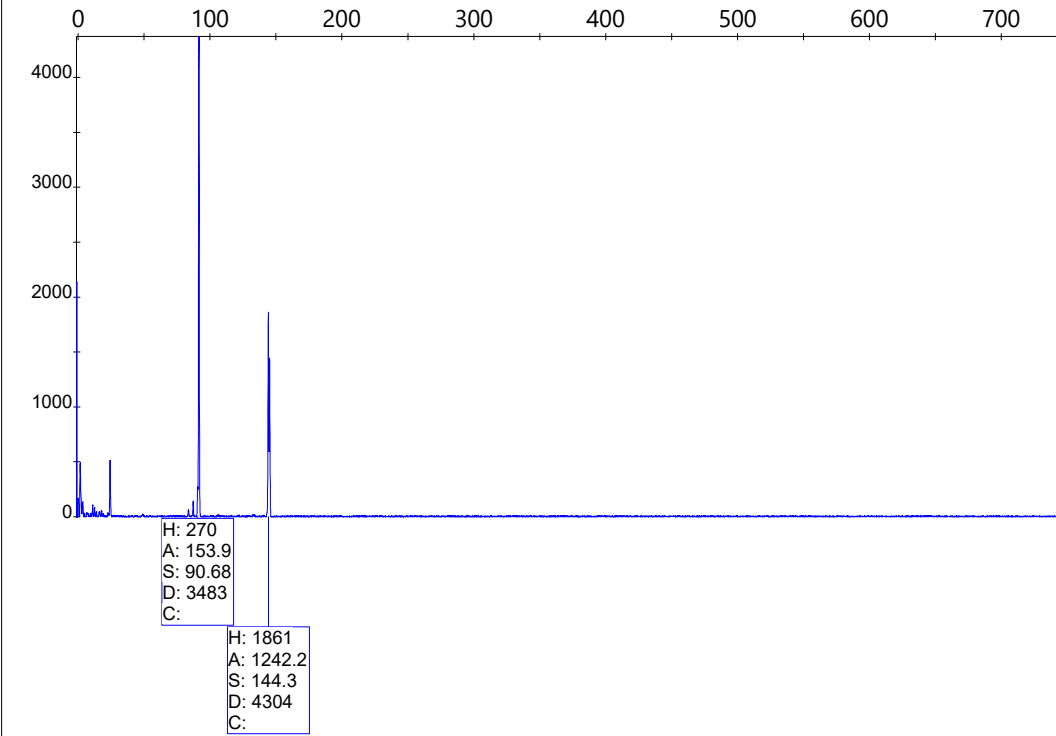

54 A10\_MultiC\_FO3\_APG23\_PR0643.fsa

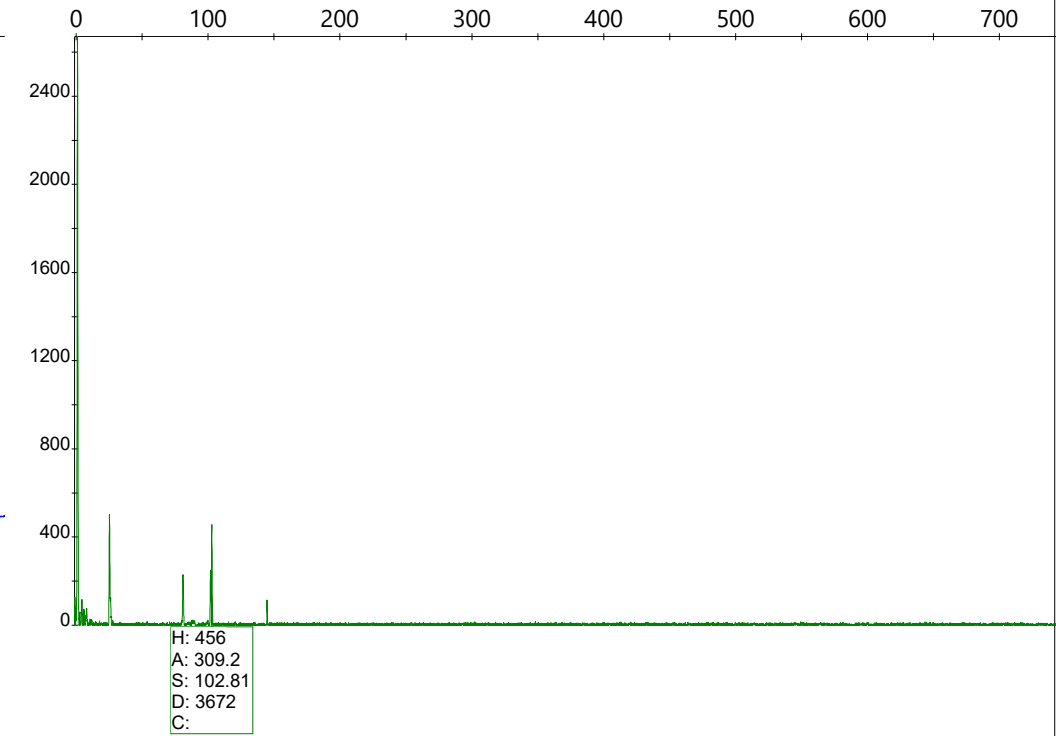

55 A10\_MultiC\_FO3\_APG23\_PR0643.fsa

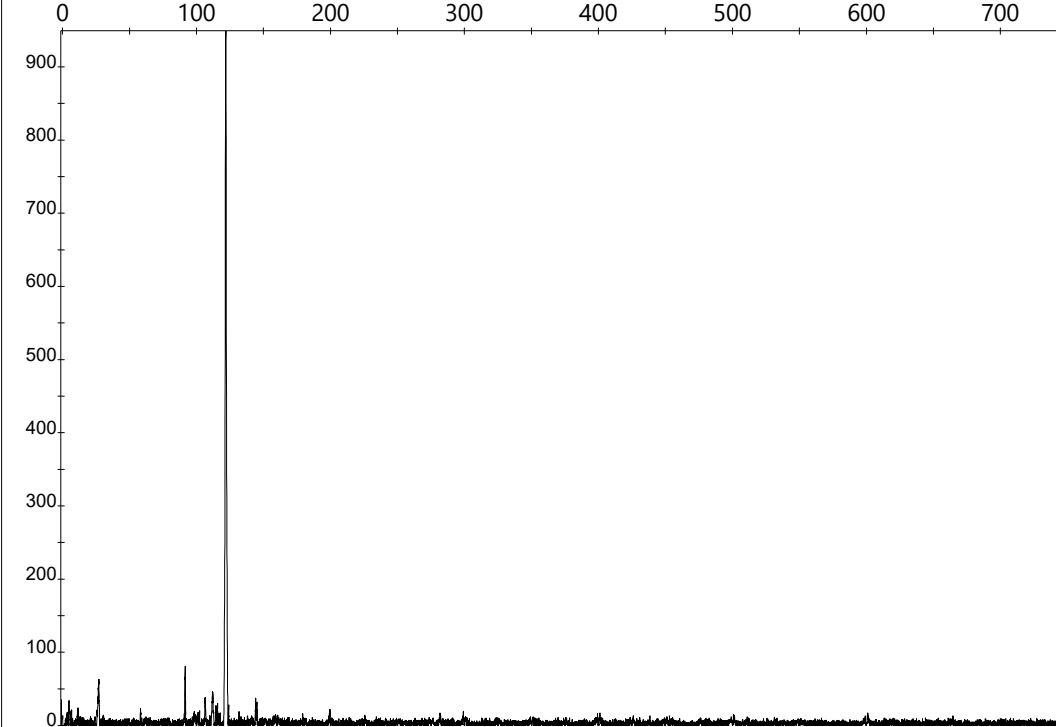

56 A10\_MultiC\_FO3\_APG23\_PR0643.fsa

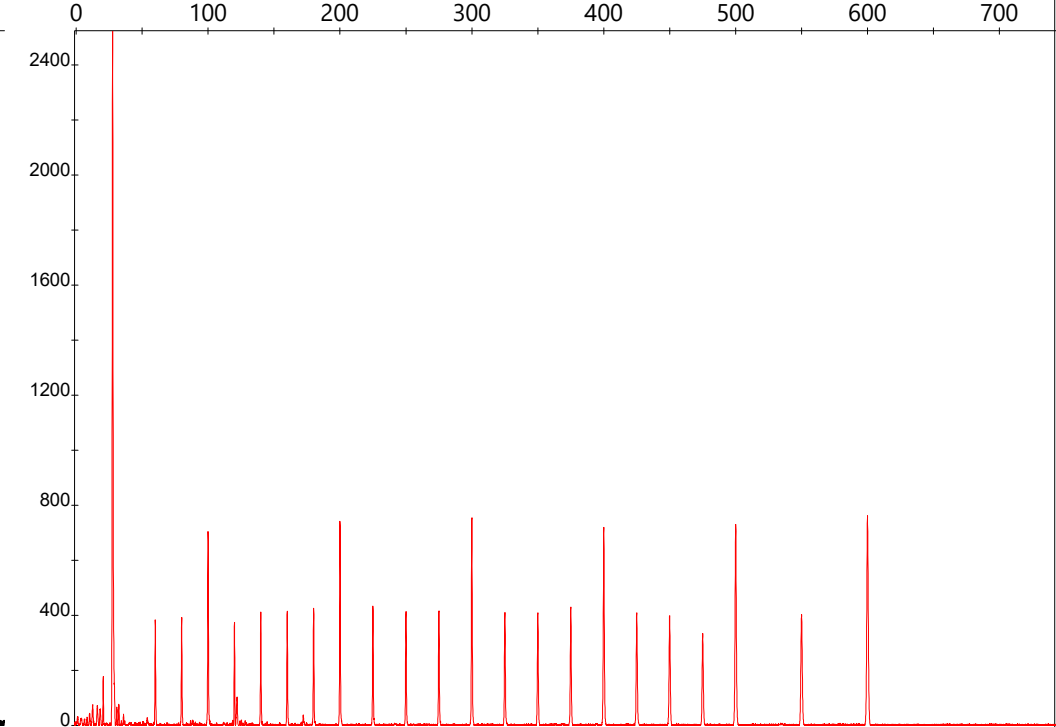

## Legend

Dye colours – Correspondig fluorophores (Microsatellite loci)

- Tamra (AK01, AK09, AK13)
- Hex (AK05, AK10, AK15)
- 6-Fam (AK03, AK07, AK12, AK23, AK28)
- Marker ILS600 (Promega)

## Multiplex Assays

MultiA: AK01, AK05, AK07, AK13

MultiB: AK03, AK09, AK10, AK12

MultiC: AK15, AK23, AK28
